# Supplementary material
Source: publisher site journal article supplement (https://www.dovepress.com/article/372143)
Supplement: Supplementary file 1 [file get_supplementary_file.php]

Appendix 1: Abbreviations of TCM herbs and ingredients of GMTG

| Abbreviation | Ingredient                                                                    |
|--------------|-------------------------------------------------------------------------------|
| HBIN011688   | 5'-hydroxyiso-muronulatol-2',5'-di-O-glucoside_qt                             |
| HBIN013410   | 7-O-methylisomucronulatol                                                     |
| HBIN014399   | acetic acid                                                                   |
| HBIN014685   | adeninenucleoside                                                             |
| HBIN017246   | astramembrannin i                                                             |
| HBIN018006   | beta carotene                                                                 |
| HBIN018100   | βetaine                                                                       |
| HBIN018163   | betaine                                                                       |
| HBIN018278   | beta-sitosterol                                                               |
| HBIN019690   | capsaicin                                                                     |
| HBIN021608   | coumarin                                                                      |
| HBIN022577   | daidzein                                                                      |
| HBIN026662   | formononetin                                                                  |
| HBIN029382   | higenamine                                                                    |
| HBIN029419   | Hirsutrin                                                                     |
| HBIN030735   | isoferulic acid                                                               |
| HBIN031753   | kaempferol                                                                    |
| HBIN033339   | linolenic acid                                                                |
| HBIN035847   | Mucronulatol                                                                  |
| HBIN037325   | nordihydrologuaiaretic acid                                                   |
| HBIN038680   | palmitic acid                                                                 |
| HBIN041495   | quercetin                                                                     |
| HBIN042670   | rutin                                                                         |
| HBIN048715   | (Z)-1-(2,4-dihydroxyphenyl)-3-(4-hydroxyphenyl)prop-2-en-1-one                |
| HBIN000841   | 1,2-DT-Quinone                                                                |
| HBIN027746   | ginsenoside rg1                                                               |
| HBIN027751   | Ginsenoside Rg3                                                               |
| HBIN027764   | ginsenoside rh2                                                               |
| HBIN030731   | isoevodiamine                                                                 |
| HBIN033793   | Lutein                                                                        |
| HBIN045506   | tanshinone iia                                                                |
| HBIN037138   | n,n-dimethyl-5-methoxy tryptamine                                             |
| HBIN042657   | rutaecarpine                                                                  |
| HBIN015584   | alpha-linolenic acid                                                          |
| HBIN016282   | anthracene                                                                    |
| HBIN020903   | cis-oleic acid                                                                |
| HBIN020908   | cis-palmitoleic acid                                                          |
| HBIN026067   | eugenol                                                                       |
| HBIN027450   | geniposide                                                                    |
| HBIN038627   | paeonol                                                                       |
| HBIN044158   | sitosterol                                                                    |
| HBIN012533   | 6-Methoxyl-2-acetyl-3-methyl-1,4-naphthoquinone-8-O-beta-D-glucopyranoside_qt |

|            |                                        |
|------------|----------------------------------------|
| HBIN039072 | pelargonidin                           |
| HBIN012122 | 6,8-Dihydroxy-7-methoxyxanthone        |
| HBIN020619 | cinaroside                             |
| HBIN020984 | citric acid                            |
| HBIN025041 | emodin                                 |
| HBIN027030 | gallic acid                            |
| HBIN037171 | nobiletin                              |
| HBIN040403 | polydatin                              |
| HBIN041726 | quercitin                              |
| HBIN042111 | resveratrol                            |
| HBIN042116 | resveratrol- 3-O- $\beta$ -D-glucoside |
| HBIN046831 | trans-resveratrol                      |
| HBIN025099 | enoxaparin                             |
| HBIN029056 | heparin                                |
| HBIN029420 | hirudin                                |
| HBIN026267 | evodin                                 |
| HBIN026385 | farnesol                               |
| HBIN027729 | ginsenoside rb1                        |
| HBIN027742 | ginsenoside re                         |
| HBIN027745 | ginsenoside rf                         |
| HBIN014693 | adenosine                              |
| HBIN027456 | genistein                              |
| HBIN032754 | lauric acid                            |
| HBIN035353 | methyl palmitate                       |
| HBIN044918 | stigmasterol                           |
| HBIN046945 | trichosanthin                          |
| HBIN046960 | tricin                                 |
| HBIN048051 | vitamin e                              |
| HBIN049051 | zoomaric acid                          |
| HBIN017893 | berberine                              |
| HBIN021430 | coptisine                              |
| HBIN024325 | d-mannitol                             |
| HBIN024823 | eckol                                  |
| HBIN026440 | FER                                    |
| HBIN028430 | groenlandicine                         |
| HBIN029438 | histamine                              |
| HBIN029771 | hydroxytyrosol                         |
| HBIN031501 | jatrorrizine                           |
| HBIN037638 | obaculactone                           |
| HBIN037644 | obakulactone                           |
| HBIN038666 | palmatine                              |
| HBIN046110 | tetrandrine                            |
| HBIN015580 | alpha-limonene                         |
| HBIN019111 | butylated hydroxytoluene               |

|            |                                                                                        |
|------------|----------------------------------------------------------------------------------------|
| HBIN023204 | delta-elemene                                                                          |
| HBIN023519 | DFV                                                                                    |
| HBIN023977 | dihydrorutaecarpine                                                                    |
| HBIN024310 | d-limonene                                                                             |
| HBIN026262 | evoden                                                                                 |
| HBIN026264 | evodiamine                                                                             |
| HBIN047613 | ursolic acid                                                                           |
| HBIN001564 | 15,16-dihydrotanshinone i                                                              |
| HBIN002684 | 1-ketoisocryptotanshinone                                                              |
| HBIN004404 | 2-(4-hydroxy-3-methoxyphenyl)-5-(3-hydroxypropyl)-7-methoxy-3-benzofurancarboxaldehyde |
| HBIN005860 | 2-isopropyl-8-methylphenanthrene-3,4-dione                                             |
| HBIN010697 | 4-methylenemiltirone                                                                   |
| HBIN015286 | aloemodin                                                                              |
| HBIN015368 | alpha-amyrin                                                                           |
| HBIN016408 | apigenin                                                                               |
| HBIN017343 | aucubin                                                                                |
| HBIN019298 | caffeic acid                                                                           |
| HBIN021795 | cryptotanshinone                                                                       |
| HBIN022076 | cyanidol                                                                               |
| HBIN022650 | danshensu                                                                              |
| HBIN022658 | dan-shexinkum a                                                                        |
| HBIN022659 | dan-shexinkum b                                                                        |
| HBIN022661 | dan-shexinkum d                                                                        |
| HBIN023376 | deoxyneocryptotanshinone                                                               |
| HBIN023910 | dihydroisotanshinoneI                                                                  |
| HBIN023990 | dihydrotanshinolactone                                                                 |
| HBIN025329 | epidanshenspiroketallactone                                                            |
| HBIN030624 | isocryptotanshi-none                                                                   |
| HBIN031285 | Isotanshinone II                                                                       |
| HBIN032488 | labiatenicacid                                                                         |
| HBIN033803 | luteolin                                                                               |
| HBIN035537 | miltionone I                                                                           |
| HBIN036604 | neocryptotanshinone ii                                                                 |
| HBIN037940 | oleanolic acid                                                                         |
| HBIN038026 | oleic acid                                                                             |
| HBIN042418 | Rosemary acid                                                                          |
| HBIN042901 | salvianolic acid b                                                                     |
| HBIN045505 | tanshinone i                                                                           |

| Abbreviation | Chinese name | Academic Name            | English name                  |
|--------------|--------------|--------------------------|-------------------------------|
| HQ           | HUANG QI     | Radix Astragali          | root of Membranous Milkvetch  |
| DS           | DAN SHEN     | Radix Salviae liguliobae | root of Ligulilobe sage       |
| GL           | GUA LOU      | Trichosanthis Fructus    | Trichosanthes Kirilowii Maxim |
| HL           | HUANG LIAN   | Rhizoma Coptidis         | rhizome of Chinese Goldthread |

|     |            |                                      |                             |
|-----|------------|--------------------------------------|-----------------------------|
| SQ  | SAN QI     | Radix Notoginseng                    | Sanchi                      |
| XS  | XUAN SHEN  | Radix Scrophulariae                  | Figwort Root                |
| ZBM | ZHE BEI MU | Bulbus Fritillariae thunbergii       | bulb of Thunberg Fritillary |
| HZ  | HU ZHANG   | Rhizoma Polygoni cuspidati           | rhizome of Gaint Knotweed   |
| SZ  | SHUI ZHI   | Gardenia jasminoides var.grandiflora | Bigflower Cape Jasmine      |

Appendix 2: The result of KEGG pathway enrichment analysis

| ID       | Description                                          | Gene Ratio | BgRatio  | pvalue      | p.adjust    | qvalue      | geneID                                                                                                                                                                                                                                                                                                                                                                          | Count |
|----------|------------------------------------------------------|------------|----------|-------------|-------------|-------------|---------------------------------------------------------------------------------------------------------------------------------------------------------------------------------------------------------------------------------------------------------------------------------------------------------------------------------------------------------------------------------|-------|
| hsa04933 | AGE-RAGE signaling pathway in diabetic complications | 47/384     | 100/8115 | 2.96757E-36 | 8.93238E-34 | 3.43613E-34 | AGT/AKT1/BAX/BCL2/CASP3/CCL2/CCND1/CDC42/CDK4/COL1A1/COL3A1/CXCL8/EDN1/F3/FN1/FOXO1/ICAM1/IL1A/IL1B/IL6/JUN/MAPK1/MAPK14/MAPK3/MAPK8/MAPK9/MMP2/NFKB1/NOS3/NOX4/PRKCA/PRKCB/PRKCD/RAC1/RELA/SELE/SERPINE1/SMAD2/SMAD3/SAT1/STAT3/TGFB1/TGFB2/THBD/TNF/VCAM1/VEGFA                                                                                                               | 47    |
| hsa05417 | Lipid and atherosclerosis                            | 65/384     | 215/8115 | 7.42068E-36 | 1.11681E-33 | 4.29618E-34 | AKT1/APOB/BAD/BAX/BCL2/BCL2L1/CALM3/CASP1/CASP3/CASP7/CASP8/CASP9/CCL2/CD40/CD40LG/CDC42/CXCL1/CXCL2/CXCL3/CXCL8/CYCS/CYP1A1/EIF2S1/FOS/GSK3B/HSPA5/ICAM1/IKBKB/IL12A/IL12B/IL1B/IL6/IRAK4/JUN/MAPK3K7/MAPK1/MAPK14/MAPK3/MAPK8/MAPK9/MMP1/MMP9/MYD88/NCF1/NFE2L2/NFKB1/NFKBIA/NOS3/OLR1/PPARG/PRKCA/RAC1/RELA/RXRA/SELE/SELP/SOD2/SRC/SAT3/TLR4/TNF/TNFRSF10A/TP53/TRAF2/VCAM1 | 65    |
| hsa05167 | Kaposi sarcoma-associated herpesvirus infection      | 59/384     | 194/8115 | 1.09196E-32 | 1.0956E-30  | 4.21457E-31 | AKT1/BAK1/BAX/C3/CALM3/CASP3/CASP8/CASP9/CCND1/CCR1/CCR3/CCR4/CCR5/CCR8/CD86/CDK4/CDK6/CDKN1A/CREB1/CTNNB1/CXCL1/CXCL2/CXCL3/CXCL8/CYCS/E2F1/FADD/FGF2/FOS/GSK3B/HIF1A/HLA-A/HLA-B/HLA-C/HLA-G/ICAM1/IKBKB/IL6/JUN/MAPK1/MAPK14/MAPK3/MAPK8/MAPK9/MTOR/MYC/NFKB1/NFKBIA/PTGS2/                                                                                                  | 59    |

RAC1/RAF1/RB1/RELA/SRC/STAT  
1/STAT3/TP53/TRAF2/VEGFA

|                  |                                        |        |          |                 |                 |                 |                                                                                                                                                                                                                                                                                                                                                                                                                                                                                                                                                                                                                                                                                                                                                                                                                                                                                                                                                                                                           |    |
|------------------|----------------------------------------|--------|----------|-----------------|-----------------|-----------------|-----------------------------------------------------------------------------------------------------------------------------------------------------------------------------------------------------------------------------------------------------------------------------------------------------------------------------------------------------------------------------------------------------------------------------------------------------------------------------------------------------------------------------------------------------------------------------------------------------------------------------------------------------------------------------------------------------------------------------------------------------------------------------------------------------------------------------------------------------------------------------------------------------------------------------------------------------------------------------------------------------------|----|
| hsa<br>052<br>12 | Pancreatic<br>cancer                   | 38/384 | 76/8115  | 1.00128<br>E-30 | 7.53461E<br>-29 | 2.89843E<br>-29 | AKT1/BAD/BAK1/BAX/BCL2L1/B<br>RCA2/CASP9/CCND1/CDC42/CDK4<br>/CDK6/CDKN1A/CDKN2A/E2F1/EG<br>F/EGFR/ERBB2/IKBKB/MAPK1/M<br>APK3/MAPK8/MAPK9/MTOR/NFK<br>B1/RAC1/RAD51/RAF1/RB1/RELA/<br>SMAD2/SMAD3/STAT1/STAT3/TG<br>FA/TGFB1/TGFB2/TP53/VEGFA<br>AKT1/BAD/CCL19/CCL2/CCL20/C<br>CL21/CCL25/CCL27/CCL28/CCR1/<br>CCR2/CCR3/CCR4/CCR5/CCR6/CC<br>R7/CCR8/CDC42/CX3CL1/CXCL1/C<br>XCL10/CXCL11/CXCL12/CXCL13/<br>CXCL16/CXCL2/CXCL3/CXCL5/C<br>XCL6/CXCL8/CXCL9/CXCR1/CXC<br>R2/CXCR3/CXCR5/GNAI1/GNAI2/<br>GSK3A/GSK3B/IKBKB/MAPK1/MA<br>PK3/NCF1/NFKB1/NFKBIA/PPBP/P<br>RKCB/PRKCD/RAC1/RAF1/RELA/S<br>RC/STAT1/STAT3<br>AKT1/BAK1/BAX/CALM3/CASP3/<br>CASP8/CASP9/CCL2/CCND1/CCR1/<br>CCR3/CCR5/CDK4/CDK6/CDKN1A<br>/CDKN2A/CREB1/CTNNB1/CX3CL<br>1/CXCL12/CXCL8/CXCR2/CYCS/E<br>2F1/EGFR/FADD/GNAI1/GNAI2/GS<br>K3B/HLA-A/HLA-B/HLA-C/HLA-G/<br>IKKBK/IL1B/IL6/MAPK1/MAPK14/<br>MAPK3/MDM2/MTOR/MYC/NFKB<br>1/NFKBIA/PRKCA/PRKCB/PTGER3<br>/PTGS2/RAC1/RAF1/RB1/RELA/SR<br>C/STAT3/TNF/TP53/TRAF2/VEGFA | 38 |
| hsa<br>040<br>62 | Chemokine<br>signaling<br>pathway      | 54/384 | 192/8115 | 5.00619<br>E-28 | 3.01373E<br>-26 | 1.15933E<br>-26 |                                                                                                                                                                                                                                                                                                                                                                                                                                                                                                                                                                                                                                                                                                                                                                                                                                                                                                                                                                                                           | 54 |
| hsa<br>051<br>63 | Human<br>cytomegalovir<br>us infection | 58/384 | 225/8115 | 7.09945<br>E-28 | 3.56156E<br>-26 | 1.37007E<br>-26 |                                                                                                                                                                                                                                                                                                                                                                                                                                                                                                                                                                                                                                                                                                                                                                                                                                                                                                                                                                                                           | 58 |

|                  |                                                  |        |          |                 |                 |                 |                                                                                                                                                                                                                                                                                                                                                                                                                                                                                                                                                                                                                                                                                                                                                                                                                                                                                                                                                                                                                                                                                                                                                                                                                                                                                                                                                                         |    |
|------------------|--------------------------------------------------|--------|----------|-----------------|-----------------|-----------------|-------------------------------------------------------------------------------------------------------------------------------------------------------------------------------------------------------------------------------------------------------------------------------------------------------------------------------------------------------------------------------------------------------------------------------------------------------------------------------------------------------------------------------------------------------------------------------------------------------------------------------------------------------------------------------------------------------------------------------------------------------------------------------------------------------------------------------------------------------------------------------------------------------------------------------------------------------------------------------------------------------------------------------------------------------------------------------------------------------------------------------------------------------------------------------------------------------------------------------------------------------------------------------------------------------------------------------------------------------------------------|----|
| hsa<br>054<br>18 | Fluid shear<br>stress and<br>atherosclerosi<br>s | 45/384 | 139/8115 | 2.58209<br>E-26 | 1.1103E-<br>24  | 4.27113E<br>-25 | ACTB/ACTG1/AKT1/BCL2/BMP4/C<br>ALM3/CAV1/CCL2/CTNNB1/EDN1/<br>FOS/GSTM1/GSTM2/GSTP1/HMOX<br>1/ICAM1/IFNG/IKKBK/IL1A/IL1B/J<br>UN/MAP3K7/MAPK14/MAPK8/MA<br>PK9/MMP2/MMP9/NCF1/NFE2L2/N<br>FKB1/NOS3/NQO1/PECAM1/PRKA<br>A1/PRKAA2/RAC1/RELA/SELE/SR<br>C/THBD/TNF/TP53/TRPV4/VCAM1<br>/VEGFA<br>ACACA/ADIPOR1/ADIPOR2/AKT1/<br>ALDH2/C3/C3AR1/C5/C5AR1/CASP<br>3/CASP8/CCND1/CTNNB1/CXCL1/<br>CXCL2/CXCL3/CXCL8/FADD/FAS<br>N/FOXO1/GSK3B/IKKBK/IL12A/IL<br>12B/IL1B/IL6/IRAK4/MAP3K7/MAP<br>K14/MAPK8/MAPK9/MYD88/NFKB<br>1/NFKBIA/NOX4/PPARA/PPARGC1<br>A/PRKAA1/PRKAA2/PRKAG2/REL<br>A/SIRT1/SREBF1/TLR4/TNF<br>C3/C4BPB/C5/CALM3/CASP1/CAS<br>P3/CASP7/CXCL5/CXCL6/CXCL8/F<br>OS/GNAI1/GNAI2/IL10/IL12A/IL12<br>B/IL1A/IL1B/IL6/IRAK4/IRF1/ITGB<br>1/JUN/MAPK1/MAPK14/MAPK3/M<br>APK8/MAPK9/MYD88/NFKB1/NOS<br>2/RELA/TLR4/TNF<br>AKT1/ALOX5/BAD/BCL2/BCL2L1/<br>CASP3/CASP8/CASP9/CCR5/CD40/<br>CD40LG/CYCS/GNAI1/GNAI2/IFN<br>G/IKKBK/IL10/IL12A/IL12B/IRAK4<br>/ITGB1/MAP3K7/MAPK1/MAPK14/<br>MAPK3/MAPK8/MAPK9/MYD88/N<br>FKB1/NFKBIA/NOS2/PPIF/RELA/S<br>TAT1/STAT3/TGFB1/TGFB2/TLR4/<br>TNF/XIAP<br>ADAR/AKT1/BAD/BAK1/BAX/BCL<br>2/BCL2L1/CASP3/CASP8/CASP9/C<br>CND1/CCND2/CCNE1/CD209/CD28<br>/CDK2/CDK4/CDK6/CYCS/EIF2S1/<br>FADD/FOS/GSK3B/IKKBK/IL12A/I<br>L12B/IL1A/IL1B/IL2/IL2RA/IL6/IR<br>AK4/JUN/MAP3K7/MAPK8/MAPK9<br>/MYD88/NFKB1/NFKBIA/RELA/ST | 45 |
| hsa<br>049<br>36 | Alcoholic<br>liver disease                       | 45/384 | 142/8115 | 7.20508<br>E-26 | 2.71091E<br>-24 | 1.04284E<br>-24 | N/FOXO1/GSK3B/IKKBK/IL12A/IL<br>12B/IL1B/IL6/IRAK4/MAP3K7/MAP<br>K14/MAPK8/MAPK9/MYD88/NFKB<br>1/NFKBIA/NOX4/PPARA/PPARGC1<br>A/PRKAA1/PRKAA2/PRKAG2/REL<br>A/SIRT1/SREBF1/TLR4/TNF<br>C3/C4BPB/C5/CALM3/CASP1/CAS<br>P3/CASP7/CXCL5/CXCL6/CXCL8/F<br>OS/GNAI1/GNAI2/IL10/IL12A/IL12<br>B/IL1A/IL1B/IL6/IRAK4/IRF1/ITGB<br>1/JUN/MAPK1/MAPK14/MAPK3/M<br>APK8/MAPK9/MYD88/NFKB1/NOS<br>2/RELA/TLR4/TNF<br>AKT1/ALOX5/BAD/BCL2/BCL2L1/<br>CASP3/CASP8/CASP9/CCR5/CD40/<br>CD40LG/CYCS/GNAI1/GNAI2/IFN<br>G/IKKBK/IL10/IL12A/IL12B/IRAK4<br>/ITGB1/MAP3K7/MAPK1/MAPK14/<br>MAPK3/MAPK8/MAPK9/MYD88/N<br>FKB1/NFKBIA/NOS2/PPIF/RELA/S<br>TAT1/STAT3/TGFB1/TGFB2/TLR4/<br>TNF/XIAP<br>ADAR/AKT1/BAD/BAK1/BAX/BCL<br>2/BCL2L1/CASP3/CASP8/CASP9/C<br>CND1/CCND2/CCNE1/CD209/CD28<br>/CDK2/CDK4/CDK6/CYCS/EIF2S1/<br>FADD/FOS/GSK3B/IKKBK/IL12A/I<br>L12B/IL1A/IL1B/IL2/IL2RA/IL6/IR<br>AK4/JUN/MAP3K7/MAPK8/MAPK9<br>/MYD88/NFKB1/NFKBIA/RELA/ST                                                                                                                                                                                                                                                                                                                                                                                                                             | 45 |
| hsa<br>051<br>33 | Pertussis                                        | 34/384 | 76/8115  | 1.58452<br>E-25 | 5.29935E<br>-24 | 2.03857E<br>-24 | OS/GNAI1/GNAI2/IL10/IL12A/IL12<br>B/IL1A/IL1B/IL6/IRAK4/IRF1/ITGB<br>1/JUN/MAPK1/MAPK14/MAPK3/M<br>APK8/MAPK9/MYD88/NFKB1/NOS<br>2/RELA/TLR4/TNF<br>AKT1/ALOX5/BAD/BCL2/BCL2L1/<br>CASP3/CASP8/CASP9/CCR5/CD40/<br>CD40LG/CYCS/GNAI1/GNAI2/IFN<br>G/IKKBK/IL10/IL12A/IL12B/IRAK4<br>/ITGB1/MAP3K7/MAPK1/MAPK14/<br>MAPK3/MAPK8/MAPK9/MYD88/N<br>FKB1/NFKBIA/NOS2/PPIF/RELA/S<br>TAT1/STAT3/TGFB1/TGFB2/TLR4/<br>TNF/XIAP<br>ADAR/AKT1/BAD/BAK1/BAX/BCL<br>2/BCL2L1/CASP3/CASP8/CASP9/C<br>CND1/CCND2/CCNE1/CD209/CD28<br>/CDK2/CDK4/CDK6/CYCS/EIF2S1/<br>FADD/FOS/GSK3B/IKKBK/IL12A/I<br>L12B/IL1A/IL1B/IL2/IL2RA/IL6/IR<br>AK4/JUN/MAP3K7/MAPK8/MAPK9<br>/MYD88/NFKB1/NFKBIA/RELA/ST                                                                                                                                                                                                                                                                                                                                                                                                                                                                                                                                                                                                                                                                                   | 34 |
| hsa<br>051<br>45 | Toxoplasmosi<br>s                                | 40/384 | 112/8115 | 2.47955<br>E-25 | 7.3912E-<br>24  | 2.84327E<br>-24 | OS/GNAI1/GNAI2/IL10/IL12A/IL12<br>B/IL1A/IL1B/IL6/IRAK4/IRF1/ITGB<br>1/JUN/MAPK1/MAPK14/MAPK3/M<br>APK8/MAPK9/MYD88/NFKB1/NOS<br>2/RELA/TLR4/TNF<br>AKT1/ALOX5/BAD/BCL2/BCL2L1/<br>CASP3/CASP8/CASP9/CCR5/CD40/<br>CD40LG/CYCS/GNAI1/GNAI2/IFN<br>G/IKKBK/IL10/IL12A/IL12B/IRAK4<br>/ITGB1/MAP3K7/MAPK1/MAPK14/<br>MAPK3/MAPK8/MAPK9/MYD88/N<br>FKB1/NFKBIA/NOS2/PPIF/RELA/S<br>TAT1/STAT3/TGFB1/TGFB2/TLR4/<br>TNF/XIAP<br>ADAR/AKT1/BAD/BAK1/BAX/BCL<br>2/BCL2L1/CASP3/CASP8/CASP9/C<br>CND1/CCND2/CCNE1/CD209/CD28<br>/CDK2/CDK4/CDK6/CYCS/EIF2S1/<br>FADD/FOS/GSK3B/IKKBK/IL12A/I<br>L12B/IL1A/IL1B/IL2/IL2RA/IL6/IR<br>AK4/JUN/MAP3K7/MAPK8/MAPK9<br>/MYD88/NFKB1/NFKBIA/RELA/ST                                                                                                                                                                                                                                                                                                                                                                                                                                                                                                                                                                                                                                                                                   | 40 |
| hsa<br>051<br>62 | Measles                                          | 44/384 | 139/8115 | 2.75718<br>E-25 | 7.3912E-<br>24  | 2.84327E<br>-24 | OS/GNAI1/GNAI2/IL10/IL12A/IL12<br>B/IL1A/IL1B/IL6/IRAK4/IRF1/ITGB<br>1/JUN/MAPK1/MAPK14/MAPK3/M<br>APK8/MAPK9/MYD88/NFKB1/NOS<br>2/RELA/TLR4/TNF<br>AKT1/ALOX5/BAD/BCL2/BCL2L1/<br>CASP3/CASP8/CASP9/CCR5/CD40/<br>CD40LG/CYCS/GNAI1/GNAI2/IFN<br>G/IKKBK/IL10/IL12A/IL12B/IRAK4<br>/ITGB1/MAP3K7/MAPK1/MAPK14/<br>MAPK3/MAPK8/MAPK9/MYD88/N<br>FKB1/NFKBIA/NOS2/PPIF/RELA/S<br>TAT1/STAT3/TGFB1/TGFB2/TLR4/<br>TNF/XIAP<br>ADAR/AKT1/BAD/BAK1/BAX/BCL<br>2/BCL2L1/CASP3/CASP8/CASP9/C<br>CND1/CCND2/CCNE1/CD209/CD28<br>/CDK2/CDK4/CDK6/CYCS/EIF2S1/<br>FADD/FOS/GSK3B/IKKBK/IL12A/I<br>L12B/IL1A/IL1B/IL2/IL2RA/IL6/IR<br>AK4/JUN/MAP3K7/MAPK8/MAPK9<br>/MYD88/NFKB1/NFKBIA/RELA/ST                                                                                                                                                                                                                                                                                                                                                                                                                                                                                                                                                                                                                                                                                   | 44 |

|                  |                                                                           |        |          |                 |                 |                 |                                                                                                                                                                                                                                                                                                                                                                                                                                                                                                                                                                                                                                                                                                                                                                                                                                                                                                                                                                                                                                                                            |    |
|------------------|---------------------------------------------------------------------------|--------|----------|-----------------|-----------------|-----------------|----------------------------------------------------------------------------------------------------------------------------------------------------------------------------------------------------------------------------------------------------------------------------------------------------------------------------------------------------------------------------------------------------------------------------------------------------------------------------------------------------------------------------------------------------------------------------------------------------------------------------------------------------------------------------------------------------------------------------------------------------------------------------------------------------------------------------------------------------------------------------------------------------------------------------------------------------------------------------------------------------------------------------------------------------------------------------|----|
| hsa<br>040<br>61 | Viral protein<br>interaction<br>with cytokine<br>and cytokine<br>receptor | 38/384 | 100/8115 | 2.94666<br>E-25 | 7.3912E-<br>24  | 2.84327E<br>-24 | CCL19/CCL2/CCL20/CCL21/CCL25/<br>CCL27/CCL28/CCR1/CCR2/CCR3/C<br>CR4/CCR5/CCR6/CCR7/CCR8/CX3<br>CL1/CXCL1/CXCL10/CXCL11/CXC<br>L12/CXCL13/CXCL2/CXCL3/CXCL<br>5/CXCL6/CXCL8/CXCL9/CXCR1/C<br>XCR2/CXCR3/CXCR5/IL10/IL2/IL2<br>RA/IL6/PPBP/TNF/TNFRSF10A<br>AKT1/BAD/BAX/BCL2/BIRC5/CAS<br>P3/CASP8/CASP9/CCNA2/CCNE1/C<br>DK2/CDKN1A/CREB1/CXCL8/CYC<br>S/E2F1/FADD/FOS/IKBKB/IL6/IRA<br>K4/JUN/MAP3K7/MAPK1/MAPK14/<br>MAPK3/MAPK8/MAPK9/MMP9/M<br>YC/MYD88/NFKB1/NFKBIA/PRKC<br>A/PRKCB/RAF1/RB1/RELA/SMAD<br>3/SRC/STAT1/STAT3/TGFB1/TGFB<br>2/TLR4/TNF/TP53<br>AKT1/CASP3/CASP7/CASP8/CCL2/<br>CCL20/CFLAR/CREB1/CX3CL1/CX<br>CL1/CXCL10/CXCL2/CXCL3/CXCL<br>5/CXCL6/EDN1/FADD/FOS/ICAM1/<br>IKKBKB/IL1B/IL6/IRF1/JUN/MAP3K<br>7/MAPK1/MAPK14/MAPK3/MAPK<br>8/MAPK9/MMP9/NFKB1/NFKBIA/P<br>TGS2/RELA/SELE/TNF/TRAF2/VC<br>AM1<br>CASP3/CASP8/CCL2/CCL20/CXCL<br>1/CXCL10/CXCL2/CXCL3/CXCL5/<br>CXCL6/CXCL8/FADD/FOS/GSK3B/<br>IFNG/IKBKB/IL13/IL17B/IL1B/IL4/I<br>L6/JUN/MAP3K7/MAPK1/MAPK14/<br>MAPK3/MAPK8/MAPK9/MMP1/M<br>MP9/NFKB1/NFKBIA/PTGS2/RELA<br>/TNF/TRAF2 | 38 |
| hsa<br>051<br>61 | Hepatitis B                                                               | 47/384 | 162/8115 | 4.19533<br>E-25 | 9.71381E<br>-24 | 3.73673E<br>-24 | AKT1/CASP3/CASP7/CASP8/CCL2/<br>CCL20/CFLAR/CREB1/CX3CL1/CX<br>CL1/CXCL10/CXCL2/CXCL3/CXCL<br>5/CXCL6/EDN1/FADD/FOS/ICAM1/<br>IKKBKB/IL1B/IL6/IRF1/JUN/MAP3K<br>7/MAPK1/MAPK14/MAPK3/MAPK<br>8/MAPK9/MMP9/NFKB1/NFKBIA/P<br>TGS2/RELA/SELE/TNF/TRAF2/VC<br>AM1<br>CASP3/CASP8/CCL2/CCL20/CXCL<br>1/CXCL10/CXCL2/CXCL3/CXCL5/<br>CXCL6/CXCL8/FADD/FOS/GSK3B/<br>IFNG/IKBKB/IL13/IL17B/IL1B/IL4/I<br>L6/JUN/MAP3K7/MAPK1/MAPK14/<br>MAPK3/MAPK8/MAPK9/MMP1/M<br>MP9/NFKB1/NFKBIA/PTGS2/RELA<br>/TNF/TRAF2                                                                                                                                                                                                                                                                                                                                                                                                                                                                                                                                                                    | 47 |
| hsa<br>046<br>68 | TNF signaling<br>pathway                                                  | 39/384 | 112/8115 | 3.02711<br>E-24 | 6.50828E<br>-23 | 2.50362E<br>-23 | AKT1/CASP3/CASP7/CASP8/CCL2/<br>CCL20/CFLAR/CREB1/CX3CL1/CX<br>CL1/CXCL10/CXCL2/CXCL3/CXCL<br>5/CXCL6/EDN1/FADD/FOS/ICAM1/<br>IKKBKB/IL1B/IL6/IRF1/JUN/MAP3K<br>7/MAPK1/MAPK14/MAPK3/MAPK<br>8/MAPK9/MMP9/NFKB1/NFKBIA/P<br>TGS2/RELA/SELE/TNF/TRAF2/VC<br>AM1<br>CASP3/CASP8/CCL2/CCL20/CXCL<br>1/CXCL10/CXCL2/CXCL3/CXCL5/<br>CXCL6/CXCL8/FADD/FOS/GSK3B/<br>IFNG/IKBKB/IL13/IL17B/IL1B/IL4/I<br>L6/JUN/MAP3K7/MAPK1/MAPK14/<br>MAPK3/MAPK8/MAPK9/MMP1/M<br>MP9/NFKB1/NFKBIA/PTGS2/RELA<br>/TNF/TRAF2                                                                                                                                                                                                                                                                                                                                                                                                                                                                                                                                                                    | 39 |
| hsa<br>046<br>57 | IL-17<br>signaling<br>pathway                                             | 36/384 | 94/8115  | 4.10434<br>E-24 | 8.23603E<br>-23 | 3.16826E<br>-23 | AKT1/CASP3/CASP7/CASP8/CCL2/<br>CCL20/CFLAR/CREB1/CX3CL1/CX<br>CL1/CXCL10/CXCL2/CXCL3/CXCL<br>5/CXCL6/EDN1/FADD/FOS/ICAM1/<br>IKKBKB/IL1B/IL6/IRF1/JUN/MAP3K<br>7/MAPK1/MAPK14/MAPK3/MAPK<br>8/MAPK9/MMP9/NFKB1/NFKBIA/P<br>TGS2/RELA/SELE/TNF/TRAF2/VC<br>AM1<br>CASP3/CASP8/CCL2/CCL20/CXCL<br>1/CXCL10/CXCL2/CXCL3/CXCL5/<br>CXCL6/CXCL8/FADD/FOS/GSK3B/<br>IFNG/IKBKB/IL13/IL17B/IL1B/IL4/I<br>L6/JUN/MAP3K7/MAPK1/MAPK14/<br>MAPK3/MAPK8/MAPK9/MMP1/M<br>MP9/NFKB1/NFKBIA/PTGS2/RELA<br>/TNF/TRAF2                                                                                                                                                                                                                                                                                                                                                                                                                                                                                                                                                                    | 36 |

|                  |                                                        |        |          |                 |                 |                 |                                                                                                                                                                                                                                                                                                                                                                                                                                                                                                                                                                                                                                                                                                                                                                                                                         |    |
|------------------|--------------------------------------------------------|--------|----------|-----------------|-----------------|-----------------|-------------------------------------------------------------------------------------------------------------------------------------------------------------------------------------------------------------------------------------------------------------------------------------------------------------------------------------------------------------------------------------------------------------------------------------------------------------------------------------------------------------------------------------------------------------------------------------------------------------------------------------------------------------------------------------------------------------------------------------------------------------------------------------------------------------------------|----|
| hsa<br>051<br>42 | Chagas<br>disease                                      | 37/384 | 102/8115 | 8.95821<br>E-24 | 1.68526E<br>-22 | 6.48291E<br>-23 | ACE/AKT1/C3/CASP8/CCL2/CFLA<br>R/CXCL8/FADD/FOS/GNAI1/GNAI<br>2/IFNG/IKBKB/IL10/IL12A/IL12B/I<br>L1B/IL2/IL6/IRAK4/JUN/MAPK1/M<br>APK14/MAPK3/MAPK8/MAPK9/M<br>YD88/NFKB1/NFKBIA/NOS2/RELA<br>/SERPINE1/SMAD2/TGFB1/TGFB2/<br>TLR4/TNF                                                                                                                                                                                                                                                                                                                                                                                                                                                                                                                                                                                  | 37 |
| hsa<br>052<br>15 | Prostate<br>cancer                                     | 35/384 | 97/8115  | 1.893E-<br>22   | 3.35172E<br>-21 | 1.28935E<br>-21 | AKT1/AR/BAD/BCL2/CASP9/CCN<br>D1/CCNE1/CDK2/CDKN1A/CREB1/<br>CTNNB1/E2F1/EGF/EGFR/ERBB2/F<br>OXO1/GSK3B/GSTP1/IGF1R/IKBK<br>B/INS/MAPK1/MAPK3/MDM2/MM<br>P9/MTOR/NFKB1/NFKBIA/PLAU/P<br>TEN/RAF1/RB1/RELA/TGFA/TP53<br>ADRB1/ADRB2/ADRB3/AHR/AKT1<br>/AR/BAD/BCL2/BIRC5/CCND1/CH<br>RNA7/CREB1/CYP1A1/CYP1A2/CY<br>P1B1/CYP3A4/E2F1/EGF/EGFR/EP<br>HX1/ESR1/ESR2/FGF2/FGF7/FOS/G<br>NAI1/GNAI2/GSTM1/GSTM2/JUN/<br>KPNA2/MAPK1/MAPK3/MTOR/MY<br>C/NFKB1/NR1I3/PGR/PPARA/PRK<br>CA/PRKCB/RAF1/RB1/RELA/RXR<br>A/SRC/STAT3/VEGFA/XIAP<br>ADIPOR1/ADIPOR2/AKT1/BAX/BC<br>L2L11/CASP3/CASP7/CASP8/CDC4<br>2/CXCL8/CYCS/EIF2S1/FOS/GSK3<br>A/GSK3B/IKBKB/IL1A/IL1B/IL6/IN<br>S/INSR/IRS1/JUN/MAPK14/MAPK8<br>/MAPK9/NFKB1/NR1H3/PPARA/PP<br>ARG/PRKAA1/PRKAA2/PRKAG2/R<br>AC1/RELA/RXRA/SDHA/SDHB/SR<br>EBF1/TGFB1/TNF/TRAF2 | 35 |
| hsa<br>052<br>07 | Chemical<br>carcinogenesis<br>- receptor<br>activation | 49/384 | 212/8115 | 2.35847<br>E-21 | 3.94389E<br>-20 | 1.51715E<br>-20 | AKT1/AR/BAD/BCL2/BIRC5/CCND1/CH<br>RNA7/CREB1/CYP1A1/CYP1A2/CY<br>P1B1/CYP3A4/E2F1/EGF/EGFR/EP<br>HX1/ESR1/ESR2/FGF2/FGF7/FOS/G<br>NAI1/GNAI2/GSTM1/GSTM2/JUN/<br>KPNA2/MAPK1/MAPK3/MTOR/MY<br>C/NFKB1/NR1I3/PGR/PPARA/PRK<br>CA/PRKCB/RAF1/RB1/RELA/RXR<br>A/SRC/STAT3/VEGFA/XIAP<br>ADIPOR1/ADIPOR2/AKT1/BAX/BC<br>L2L11/CASP3/CASP7/CASP8/CDC4<br>2/CXCL8/CYCS/EIF2S1/FOS/GSK3<br>A/GSK3B/IKBKB/IL1A/IL1B/IL6/IN<br>S/INSR/IRS1/JUN/MAPK14/MAPK8<br>/MAPK9/NFKB1/NR1H3/PPARA/PP<br>ARG/PRKAA1/PRKAA2/PRKAG2/R<br>AC1/RELA/RXRA/SDHA/SDHB/SR<br>EBF1/TGFB1/TNF/TRAF2                                                                                                                                                                                                                                                  | 49 |
| hsa<br>049<br>32 | Non-alcoholic<br>fatty liver<br>disease                | 42/384 | 155/8115 | 3.06086<br>E-21 | 4.84905E<br>-20 | 1.86535E<br>-20 | AKT1/CALM3/CCNA2/CCNB1/CCN<br>D1/CCND2/CCNE1/CDK2/CDK4/C<br>DK6/CDKN1A/CDKN2A/CHEK2/C<br>XCL8/E2F1/FOXO1/HLA-A/HLA-B/<br>HLA-C/HLA-G/IGFBP3/IL1A/IL6/M<br>APK1/MAPK14/MAPK3/MDM2/MT<br>OR/MYC/NFKB1/PTEN/RAF1/RB1/<br>RELA/SERPINE1/SIRT1/SMAD2/S<br>MAD3/TGFB1/TGFB2/TP53/TRPV4                                                                                                                                                                                                                                                                                                                                                                                                                                                                                                                                        | 42 |
| hsa<br>042<br>18 | Cellular<br>senescence                                 | 42/384 | 156/8115 | 4.01336<br>E-21 | 6.04011E<br>-20 | 2.32353E<br>-20 | AKT1/CALM3/CCNA2/CCNB1/CCN<br>D1/CCND2/CCNE1/CDK2/CDK4/C<br>DK6/CDKN1A/CDKN2A/CHEK2/C<br>XCL8/E2F1/FOXO1/HLA-A/HLA-B/<br>HLA-C/HLA-G/IGFBP3/IL1A/IL6/M<br>APK1/MAPK14/MAPK3/MDM2/MT<br>OR/MYC/NFKB1/PTEN/RAF1/RB1/<br>RELA/SERPINE1/SIRT1/SMAD2/S<br>MAD3/TGFB1/TGFB2/TP53/TRPV4                                                                                                                                                                                                                                                                                                                                                                                                                                                                                                                                        | 42 |



|                  |                                               |        |          |                 |                 |                 |                                                                                                                                                                                                                                                                                                                                                                                                                                                                                                                                                                                                                                                                                                                                                                                                                                                                                                                                                                                                                                                                                                                                                                           |    |
|------------------|-----------------------------------------------|--------|----------|-----------------|-----------------|-----------------|---------------------------------------------------------------------------------------------------------------------------------------------------------------------------------------------------------------------------------------------------------------------------------------------------------------------------------------------------------------------------------------------------------------------------------------------------------------------------------------------------------------------------------------------------------------------------------------------------------------------------------------------------------------------------------------------------------------------------------------------------------------------------------------------------------------------------------------------------------------------------------------------------------------------------------------------------------------------------------------------------------------------------------------------------------------------------------------------------------------------------------------------------------------------------|----|
| hsa<br>052<br>10 | Colorectal<br>cancer                          | 32/384 | 86/8115  | 4.34319<br>E-21 | 6.22524E<br>-20 | 2.39474E<br>-20 | AKT1/BAD/BAK1/BAX/BCL2/BCL2L11/BIRC5/CASP3/CASP9/CCND1/CDKN1A/CTNNB1/CYCS/EGF/EGFR/FOS/GSK3B/JUN/MAPK1/MAPK3/MAPK8/MAPK9/MTOR/MYC/RAC1/RAF1/SMAD2/SMAD3/TGFA/TGFB1/TGFB2/TP53<br>ACTB/ACTG1/AKT1/BAD/BAK1/BAX/BCL2/BCL2A1/BCL2L1/BCL2L11/BIRC5/CASP3/CASP7/CASP8/CASP9/CFLAR/CTSD/CYCS/EIF2S1/FADD/FOS/IKBKB/JUN/MAPK1/MAPK3/MAPK8/MAPK9/MCL1/NFKB1/NFKBIA/NTRK1/PARP1/RAF1/RELA/TNF/TNFRSF10A/TP53/TRAF2/XIAP<br>AKT1/BAK1/BAX/BCL2/BCL2L11/CASP3/CASP8/CASP9/CCNA2/CCND1/CCND2/CCNE1/CD40/CDK2/CDK4/CDK6/CDKN1A/CXCL10/CYCS/E2F1/FADD/HLA-A/HLA-B/HLA-C/HLA-G/ICAM1/IKBKB/IL6/IRAK4/JUN/MAP3K7/MAPK14/MAPK8/MAPK9/MDM2/MYC/MYD88/NFKB1/NFKBIA/RAC1/RB1/RELA/STAT1/STAT3/TNF/TP53/TRAF2<br>AKT1/BCL2L11/CAT/CCNB1/CCND1/CCND2/CDK2/CDKN1A/EGF/EGFR/FOXO1/HOMER2/IGF1R/IKBKB/IL10/IL6/INS/INSR/IRS1/MAPK1/MAPK14/MAPK3/MAPK8/MAPK9/MDM2/PRKAA1/PRKAA2/PRKAG2/PTEN/RAF1/S1PR1/SIRT1/SLC2A4/SMAD3/SOD2/STAT3/TGFB1/TGFB2<br>BMP2/BMP4/BMP6/CCL19/CCL2/CCL20/CCL21/CCL25/CCL27/CCL28/CCR1/CCR2/CCR3/CCR4/CCR5/CCR6/CCR7/CCR8/CD40/CD40LG/CX3CL1/CXCL11/CXCL12/CXCL13/CXCL16/CXCL2/CXCL3/CXCL5/CXCL6/CXCL8/CXCL9/CXCR1/CXCR2/CXCR3/CXCR5/EPH2/O/GH1/IFNG/IL10/IL12A/IL12B/IL1 | 32 |
| hsa<br>042<br>10 | Apoptosis                                     | 39/384 | 136/8115 | 9.31504<br>E-21 | 1.27447E<br>-19 | 4.90266E<br>-20 | AKT1/BAK1/BAX/BCL2/BCL2L11/CASP3/CASP8/CASP9/CCNA2/CCND1/CCND2/CCNE1/CD40/CDK2/CDK4/CDK6/CDKN1A/CXCL10/CYCS/E2F1/FADD/HLA-A/HLA-B/HLA-C/HLA-G/ICAM1/IKBKB/IL6/IRAK4/JUN/MAP3K7/MAPK14/MAPK8/MAPK9/MDM2/MYC/MYD88/NFKB1/NFKBIA/RAC1/RB1/RELA/STAT1/STAT3/TNF/TP53/TRAF2<br>AKT1/BCL2L11/CAT/CCNB1/CCND1/CCND2/CDK2/CDKN1A/EGF/EGFR/FOXO1/HOMER2/IGF1R/IKBKB/IL10/IL6/INS/INSR/IRS1/MAPK1/MAPK14/MAPK3/MAPK8/MAPK9/MDM2/PRKAA1/PRKAA2/PRKAG2/PTEN/RAF1/S1PR1/SIRT1/SLC2A4/SMAD3/SOD2/STAT3/TGFB1/TGFB2<br>BMP2/BMP4/BMP6/CCL19/CCL2/CCL20/CCL21/CCL25/CCL27/CCL28/CCR1/CCR2/CCR3/CCR4/CCR5/CCR6/CCR7/CCR8/CD40/CD40LG/CX3CL1/CXCL11/CXCL12/CXCL13/CXCL16/CXCL2/CXCL3/CXCL5/CXCL6/CXCL8/CXCL9/CXCR1/CXCR2/CXCR3/CXCR5/EPH2/O/GH1/IFNG/IL10/IL12A/IL12B/IL1                                                                                                                                                                                                                                                                                                                                                                                                                   | 39 |
| hsa<br>051<br>69 | Epstein-Barr<br>virus infection               | 47/384 | 202/8115 | 1.22671<br>E-20 | 1.60539E<br>-19 | 6.17567E<br>-20 | AKT1/BAK1/BAX/BCL2/BCL2L11/CASP3/CASP8/CASP9/CCNA2/CCND1/CCND2/CCNE1/CD40/CDK2/CDK4/CDK6/CDKN1A/CXCL10/CYCS/E2F1/FADD/HLA-A/HLA-B/HLA-C/HLA-G/ICAM1/IKBKB/IL6/IRAK4/JUN/MAP3K7/MAPK14/MAPK8/MAPK9/MDM2/MYC/MYD88/NFKB1/NFKBIA/RAC1/RB1/RELA/STAT1/STAT3/TNF/TP53/TRAF2<br>AKT1/BCL2L11/CAT/CCNB1/CCND1/CCND2/CDK2/CDKN1A/EGF/EGFR/FOXO1/HOMER2/IGF1R/IKBKB/IL10/IL6/INS/INSR/IRS1/MAPK1/MAPK14/MAPK3/MAPK8/MAPK9/MDM2/PRKAA1/PRKAA2/PRKAG2/PTEN/RAF1/S1PR1/SIRT1/SLC2A4/SMAD3/SOD2/STAT3/TGFB1/TGFB2<br>BMP2/BMP4/BMP6/CCL19/CCL2/CCL20/CCL21/CCL25/CCL27/CCL28/CCR1/CCR2/CCR3/CCR4/CCR5/CCR6/CCR7/CCR8/CD40/CD40LG/CX3CL1/CXCL11/CXCL12/CXCL13/CXCL16/CXCL2/CXCL3/CXCL5/CXCL6/CXCL8/CXCL9/CXCR1/CXCR2/CXCR3/CXCR5/EPH2/O/GH1/IFNG/IL10/IL12A/IL12B/IL1                                                                                                                                                                                                                                                                                                                                                                                                                   | 47 |
| hsa<br>040<br>68 | FoxO<br>signaling<br>pathway                  | 38/384 | 131/8115 | 1.92257<br>E-20 | 2.41123E<br>-19 | 9.27557E<br>-20 | AKT1/BAK1/BAX/BCL2/BCL2L11/CASP3/CASP8/CASP9/CCNA2/CCND1/CCND2/CCNE1/CD40/CDK2/CDK4/CDK6/CDKN1A/CXCL10/CYCS/E2F1/FADD/HLA-A/HLA-B/HLA-C/HLA-G/ICAM1/IKBKB/IL6/IRAK4/JUN/MAP3K7/MAPK14/MAPK8/MAPK9/MDM2/PRKAA1/PRKAA2/PRKAG2/PTEN/RAF1/S1PR1/SIRT1/SLC2A4/SMAD3/SOD2/STAT3/TGFB1/TGFB2<br>BMP2/BMP4/BMP6/CCL19/CCL2/CCL20/CCL21/CCL25/CCL27/CCL28/CCR1/CCR2/CCR3/CCR4/CCR5/CCR6/CCR7/CCR8/CD40/CD40LG/CX3CL1/CXCL11/CXCL12/CXCL13/CXCL16/CXCL2/CXCL3/CXCL5/CXCL6/CXCL8/CXCL9/CXCR1/CXCR2/CXCR3/CXCR5/EPH2/O/GH1/IFNG/IL10/IL12A/IL12B/IL1                                                                                                                                                                                                                                                                                                                                                                                                                                                                                                                                                                                                                                  | 38 |
| hsa<br>040<br>60 | Cytokine-cyto<br>kine receptor<br>interaction | 56/384 | 295/8115 | 6.23396<br>E-20 | 7.50569E<br>-19 | 2.88731E<br>-19 | AKT1/BAK1/BAX/BCL2/BCL2L11/CASP3/CASP8/CASP9/CCNA2/CCND1/CCND2/CCNE1/CD40/CDK2/CDK4/CDK6/CDKN1A/CXCL10/CYCS/E2F1/FADD/HLA-A/HLA-B/HLA-C/HLA-G/ICAM1/IKBKB/IL6/IRAK4/JUN/MAP3K7/MAPK14/MAPK8/MAPK9/MDM2/PRKAA1/PRKAA2/PRKAG2/PTEN/RAF1/S1PR1/SIRT1/SLC2A4/SMAD3/SOD2/STAT3/TGFB1/TGFB2<br>BMP2/BMP4/BMP6/CCL19/CCL2/CCL20/CCL21/CCL25/CCL27/CCL28/CCR1/CCR2/CCR3/CCR4/CCR5/CCR6/CCR7/CCR8/CD40/CD40LG/CX3CL1/CXCL11/CXCL12/CXCL13/CXCL16/CXCL2/CXCL3/CXCL5/CXCL6/CXCL8/CXCL9/CXCR1/CXCR2/CXCR3/CXCR5/EPH2/O/GH1/IFNG/IL10/IL12A/IL12B/IL1                                                                                                                                                                                                                                                                                                                                                                                                                                                                                                                                                                                                                                  | 56 |



|                  |                              |        |          |                 |                 |                 |                                                                                                                                                                                                                            |    |
|------------------|------------------------------|--------|----------|-----------------|-----------------|-----------------|----------------------------------------------------------------------------------------------------------------------------------------------------------------------------------------------------------------------------|----|
| hsa<br>051<br>60 | Hepatitis C                  | 40/384 | 157/8115 | 3.30683<br>E-19 | 3.31786E<br>-18 | 1.27632E<br>-18 | AKT1/BAD/BAK1/BAX/CASP3/CASP8/CASP9/CCND1/CDK2/CDK4/CDK6/CDKN1A/CFLAR/CTNNB1/CXCL10/CYCS/E2F1/EGF/EGFR/EIF2S1/FADD/GSK3B/IFNG/IKBKB/MAPK1/MAPK3/MYC/NFKB1/NFKBIA/NR1H3/PPARA/RAF1/RB1/RELA/RXRA/STAT1/STAT3/TNF/TP53/TRAF2 | 40 |
| hsa<br>040<br>66 | HIF-1 signaling pathway      | 33/384 | 109/8115 | 1.62015<br>E-18 | 1.57312E<br>-17 | 6.05151E<br>-18 | AKT1/BCL2/CDKN1A/EDN1/EGF/EGFR/ENO1/ENO2/ENO3/EPO/ERBB2/HIF1A/HMOX1/IFNG/IGF1R/IL6/INS/INSR/MAPK1/MAPK3/MTOR/NFKB1/NOS2/NOS3/NPPA/PRKCA/PRKCB/RELA/SERPINE1/STAT3/TIMP1/TLR4/VEGFA                                         | 33 |
| hsa<br>052<br>22 | Small cell lung cancer       | 30/384 | 92/8115  | 5.94751<br>E-18 | 5.59437E<br>-17 | 2.15206E<br>-17 | AKT1/BAK1/BAX/BCL2/BCL2L1/CASP3/CASP9/CCND1/CCNE1/CDK2/CDK4/CDK6/CDKN1A/CYCS/E2F1/FN1/IKBKB/ITGB1/MYC/NFKB1/NFKBIA/NOS2/PTEN/PTGS2/RB1/RELA/RXRA/TP53/TRAF2/XIAP                                                           | 30 |
| hsa<br>052<br>19 | Bladder cancer               | 21/384 | 41/8115  | 9.88872<br>E-18 | 9.01971E<br>-17 | 3.46973E<br>-17 | CCND1/CDK4/CDKN1A/CDKN2A/CXCL8/E2F1/EGF/EGFR/ERBB2/MAPK1/MAPK3/MDM2/MMP1/MMP2/MMP9/MYC/RAF1/RB1/SRC/TP53/VEGFA                                                                                                             | 21 |
| hsa<br>040<br>64 | NF-kappa B signaling pathway | 31/384 | 104/8115 | 3.04971<br>E-17 | 2.69989E<br>-16 | 1.0386E-<br>16  | BCL2/BCL2A1/BCL2L1/CCL19/CCL21/CD40/CD40LG/CFLAR/CXCL1/CXCL12/CXCL2/CXCL3/CXCL8/ICAM1/IKBKB/IL1B/IRAK4/MAP3K7/MYD88/NFKB1/NFKBIA/PARP1/PLAU/PRKCB/PTGS2/RELA/TLR4/TNF/TRAF2/VCAM1/XIAP                                     | 31 |
| hsa<br>052<br>25 | Hepatocellular carcinoma     | 39/384 | 168/8115 | 3.14245<br>E-17 | 2.70251E<br>-16 | 1.03961E<br>-16 | ACTB/ACTG1/AKT1/BAD/BAK1/BAX/BCL2L1/CCND1/CDK4/CDK6/CDKN1A/CDKN2A/CTNNB1/E2F1/EGFR/GSK3B/GSTM1/GSTM2/GSTP1/HMOX1/IGF1R/MAPK1/MAPK3/MTOR/MYC/NFE2L2/NQO1/PRKCA/PRKCB/PTEN/RAF1/RB1/SMAD2/SMAD3/TGFA/TGFB1/TGFB2/TP53/WNT4   | 39 |

|                  |                                                    |        |          |                 |                 |                 |                                                                                                                                                                                                                                                                                                                                                                                                                                                                                                                                                                                                                                                                                                                                                                                                                                                                                                                                                                                                                                                                                                                                                                                                                                                                                                                                                                                      |    |
|------------------|----------------------------------------------------|--------|----------|-----------------|-----------------|-----------------|--------------------------------------------------------------------------------------------------------------------------------------------------------------------------------------------------------------------------------------------------------------------------------------------------------------------------------------------------------------------------------------------------------------------------------------------------------------------------------------------------------------------------------------------------------------------------------------------------------------------------------------------------------------------------------------------------------------------------------------------------------------------------------------------------------------------------------------------------------------------------------------------------------------------------------------------------------------------------------------------------------------------------------------------------------------------------------------------------------------------------------------------------------------------------------------------------------------------------------------------------------------------------------------------------------------------------------------------------------------------------------------|----|
| hsa<br>015<br>22 | Endocrine<br>resistance                            | 30/384 | 98/8115  | 4.40598<br>E-17 | 3.68389E<br>-16 | 1.41713E<br>-16 | AKT1/BAD/BAX/BCL2/CCND1/CD<br>K4/CDKN1A/CDKN2A/E2F1/EGFR/<br>ERBB2/ESR1/ESR2/FOS/GPER1/IG<br>F1R/JUN/MAPK1/MAPK14/MAPK3/<br>MAPK8/MAPK9/MDM2/MMP2/MM<br>P9/MTOR/RAF1/RB1/SRC/TP53<br>AKT1/BAD/BAX/BCL2/C3/CALM3/<br>CASP3/CASP8/CASP9/CD209/CLEC<br>7A/CREB1/CTSD/CYCS/FADD/IFN<br>G/IL10/IL12A/IL12B/IL1A/IL1B/IL6/<br>IRAK4/MAPK1/MAPK14/MAPK3/M<br>APK8/MAPK9/MYD88/NFKB1/NOS<br>2/RAF1/RELA/SPHK1/SRC/STAT1/<br>TGFB1/TGFB2/TLR4/TNF<br>AGT/AKT1/CREB1/FOXO1/GSK3B/<br>IKBKB/IL6/INS/INSR/IRS1/MAPK8/<br>MAPK9/MTOR/NFKB1/NFKBIA/N<br>OS3/NR1H3/PPARA/PPARGC1A/PR<br>KAA1/PRKAA2/PRKAG2/PRKCB/P<br>RKCD/PTEN/RELA/SLC2A2/SLC2A<br>4/SREBF1/STAT3/TNF<br>ACTB/ACTG1/AKT1/CASP3/CAV1/<br>CCND1/CDC42/CDKN1A/COL1A1/<br>CTNNB1/EGFR/ERBB2/ESR1/FGF2/<br>FN1/HIF1A/IGF1R/IL12B/ITGB1/M<br>APK1/MAPK14/MAPK3/MDM2/M<br>MP2/MMP9/MTOR/MYC/PLAU/PR<br>KCA/PRKCB/RAC1/RAF1/SMAD2/<br>SRC/STAT3/TGFB1/TGFB2/TLR4/T<br>NF/TP53/VEGFA/WNT4<br>AKT1/CALM3/CASP1/CASP8/CD20<br>9/CLEC7A/IKBKB/IL10/IL12A/IL12<br>B/IL1B/IL2/IL6/IRF1/JUN/MAPK1/<br>MAPK14/MAPK3/MAPK8/MAPK9/<br>MDM2/NFKB1/NFKBIA/PRKCD/PT<br>GS2/RAF1/RELA/SRC/STAT1/TNF<br>AKT1/BAD/BAK1/BAX/BCL2/BCL<br>2L1/CALM3/CASP3/CASP8/CASP9/<br>CCNB1/CCR5/CYCS/FADD/FOS/G<br>NAI1/GNAI2/HLA-A/HLA-B/HLA-C<br>/HLA-G/IKBKB/IRAK4/JUN/MAP3<br>K7/MAPK1/MAPK14/MAPK3/MAP<br>K8/MAPK9/MTOR/MYD88/NFKB1/<br>NFKBIA/PRKCA/PRKCB/RAC1/RA | 30 |
| hsa<br>051<br>52 | Tuberculosis                                       | 40/384 | 180/8115 | 6.21822<br>E-17 | 5.0586E-<br>16  | 1.94596E<br>-16 |                                                                                                                                                                                                                                                                                                                                                                                                                                                                                                                                                                                                                                                                                                                                                                                                                                                                                                                                                                                                                                                                                                                                                                                                                                                                                                                                                                                      | 40 |
| hsa<br>049<br>31 | Insulin<br>resistance                              | 31/384 | 108/8115 | 1.015E-<br>16   | 8.03988E<br>-16 | 3.0928E-<br>16  |                                                                                                                                                                                                                                                                                                                                                                                                                                                                                                                                                                                                                                                                                                                                                                                                                                                                                                                                                                                                                                                                                                                                                                                                                                                                                                                                                                                      | 31 |
| hsa<br>052<br>05 | Proteoglycans<br>in cancer                         | 42/384 | 205/8115 | 2.27303<br>E-16 | 1.75431E<br>-15 | 6.74854E<br>-16 |                                                                                                                                                                                                                                                                                                                                                                                                                                                                                                                                                                                                                                                                                                                                                                                                                                                                                                                                                                                                                                                                                                                                                                                                                                                                                                                                                                                      | 42 |
| hsa<br>046<br>25 | C-type lectin<br>receptor<br>signaling<br>pathway  | 30/384 | 104/8115 | 2.7797E<br>-16  | 2.09173E<br>-15 | 8.0465E-<br>16  |                                                                                                                                                                                                                                                                                                                                                                                                                                                                                                                                                                                                                                                                                                                                                                                                                                                                                                                                                                                                                                                                                                                                                                                                                                                                                                                                                                                      | 30 |
| hsa<br>051<br>70 | Human<br>immunodefici<br>ency virus 1<br>infection | 42/384 | 212/8115 | 8.09422<br>E-16 | 5.94234E<br>-15 | 2.28592E<br>-15 |                                                                                                                                                                                                                                                                                                                                                                                                                                                                                                                                                                                                                                                                                                                                                                                                                                                                                                                                                                                                                                                                                                                                                                                                                                                                                                                                                                                      | 42 |

F1/RELA/TLR4/TNF/TRAF2

|     |                |        |          |         |          |          |                                 |    |
|-----|----------------|--------|----------|---------|----------|----------|---------------------------------|----|
| hsa | Human T-cell   |        |          |         |          |          | AKT1/BAX/BCL2L1/CCNA2/CCND      |    |
| 051 | leukemia virus | 43/384 | 222/8115 | 8.47783 | 6.07578E | 2.33725E | 1/CCND2/CCNE1/CD40/CDK2/CDK     | 43 |
| 66  | 1 infection    |        |          | E-16    | -15      | -15      | 4/CDKN1A/CDKN2A/CHEK2/CREB      |    |
|     |                |        |          |         |          |          | 1/E2F1/FOS/HLA-A/HLA-B/HLA-C/   |    |
|     |                |        |          |         |          |          | HLA-G/ICAM1/IKBKB/IL2/IL2RA/I   |    |
|     |                |        |          |         |          |          | L6/JUN/MAPK1/MAPK3/MAPK8/M      |    |
|     |                |        |          |         |          |          | APK9/MYC/NFKB1/NFKBIA/PTEN/     |    |
|     |                |        |          |         |          |          | RB1/RELA/SMAD2/SMAD3/TGFB1      |    |
|     |                |        |          |         |          |          | /TGFB2/TNF/TP53/XIAP            |    |
| hsa | Chronic        |        |          |         |          |          | AKT1/BAD/BAK1/BAX/BCL2L1/C      |    |
| 052 | myeloid        | 25/384 | 76/8115  | 2.96814 | 2.04119E | 7.85209E | CND1/CDK4/CDK6/CDKN1A/CDK       | 25 |
| 20  | leukemia       |        |          | E-15    | -14      | -15      | N2A/E2F1/IKBKB/MAPK1/MAPK3/     |    |
|     |                |        |          |         |          |          | MDM2/MYC/NFKB1/NFKBIA/RAF       |    |
|     |                |        |          |         |          |          | 1/RB1/RELA/SMAD3/TGFB1/TGFB     |    |
|     |                |        |          |         |          |          | 2/TP53                          |    |
| hsa |                |        |          |         |          |          | ARF1/C3/CASP1/CASP3/CASP7/CA    |    |
| 051 | Legionellosis  | 22/384 | 57/8115  | 2.98379 | 2.04119E | 7.85209E | SP8/CASP9/CXCL1/CXCL2/CXCL3/    | 22 |
| 34  |                |        |          | E-15    | -14      | -15      | CXCL8/CYCS/IL12A/IL12B/IL1B/IL  |    |
|     |                |        |          |         |          |          | 6/MYD88/NFKB1/NFKBIA/RELA/T     |    |
|     |                |        |          |         |          |          | LR4/TNF                         |    |
| hsa |                |        |          |         |          |          | ACTB/ACTG1/AKT1/CASP1/CCL2/     |    |
| 051 | Yersinia       | 33/384 | 137/8115 | 3.05733 | 2.04502E | 7.86682E | CDC42/CXCL8/FN1/FOS/GSK3B/IK    | 33 |
| 35  | infection      |        |          | E-15    | -14      | -15      | BKB/IL10/IL1B/IL2/IL6/IRAK4/ITG |    |
|     |                |        |          |         |          |          | B1/JUN/MAP3K7/MAPK1/MAPK14/     |    |
|     |                |        |          |         |          |          | MAPK3/MAPK8/MAPK9/MYD88/N       |    |
|     |                |        |          |         |          |          | FKB1/NFKBIA/RAC1/RELA/SRC/T     |    |
|     |                |        |          |         |          |          | LR4/TNF/TRAF2                   |    |
| hsa | Chemical       |        |          |         |          |          | AHR/AKT1/ATP5F1B/BAD/CAT/C      |    |
| 052 | carcinogenesis | 42/384 | 223/8115 | 5.31572 | 3.47833E | 1.33805E | YP1A1/CYP1A2/CYP1B1/EGF/EGF     | 42 |
| 08  | - reactive     |        |          | E-15    | -14      | -14      | R/EPHX1/FOS/GSTM1/GSTM2/HIF     |    |
|     | oxygen         |        |          |         |          |          | 1A/HMOX1/IKBKB/JUN/MAPK1/M      |    |
|     | species        |        |          |         |          |          | APK14/MAPK3/MAPK8/MAPK9/N       |    |
|     |                |        |          |         |          |          | CF1/NFE2L2/NFKB1/NFKBIA/NOX     |    |
|     |                |        |          |         |          |          | 4/NQO1/PPIF/PRKCD/PRKD1/PTEN    |    |
|     |                |        |          |         |          |          | /RAC1/RAF1/RELA/SDHA/SDHB/S     |    |
|     |                |        |          |         |          |          | OD1/SOD2/SRC/VEGFA              |    |

|                  |                                             |        |          |                 |                 |                 |                                                                                                                                                                                                                                                                                                                                                                                                                                                                                                                                                                                                                                                                                                                                                                                                                                                                                                                                                                                                                                                                                                                                                                                                                                    |    |
|------------------|---------------------------------------------|--------|----------|-----------------|-----------------|-----------------|------------------------------------------------------------------------------------------------------------------------------------------------------------------------------------------------------------------------------------------------------------------------------------------------------------------------------------------------------------------------------------------------------------------------------------------------------------------------------------------------------------------------------------------------------------------------------------------------------------------------------------------------------------------------------------------------------------------------------------------------------------------------------------------------------------------------------------------------------------------------------------------------------------------------------------------------------------------------------------------------------------------------------------------------------------------------------------------------------------------------------------------------------------------------------------------------------------------------------------|----|
| hsa<br>052<br>23 | Non-small cell<br>lung cancer               | 24/384 | 72/8115  | 7.70069<br>E-15 | 4.93172E<br>-14 | 1.89715E<br>-14 | AKT1/BAD/BAK1/BAX/CASP9/CC<br>ND1/CDK4/CDK6/CDKN1A/CDKN<br>2A/E2F1/EGF/EGFR/ERBB2/MAPK<br>1/MAPK3/PRKCA/PRKCB/RAF1/R<br>B1/RXRA/STAT3/TGFA/TP53<br>ACTB/ACTG1/ARF1/BAK1/BAX/C<br>ASP1/CASP3/CASP7/CASP8/CASP9<br>/CDC42/CXCL8/CYCS/F2/FADD/FO<br>S/FYN/IKKBK/IL1B/IL6/IRAK4/ITG<br>B1/JUN/MAP3K7/MAPK1/MAPK14/<br>MAPK3/MAPK8/MAPK9/MYD88/N<br>FKB1/NFKBIA/RAC1/RELA/SRC/T<br>LR4/TNF/TNFRSF10A/TRAF2<br>AKT1/BAD/BAK1/BAX/BCL2/BCL<br>2L1/BIRC5/BRCA1/CASP3/CASP8/<br>CASP9/CDKN1A/CDKN2A/CYCS/E<br>RBB2/FADD/GSTM1/GSTM2/GSTP<br>1/MAPK1/MAPK3/MDM2/TP53/XIA<br>P<br>BAX/BCL2/BCL2L1/CASP3/CASP8/<br>CASP9/CCNB1/CCND1/CCND2/CC<br>NE1/CDK2/CDK4/CDK6/CDKN1A/<br>CDKN2A/CHEK2/CYCS/IGFBP3/M<br>DM2/PTEN/RRM2/SERPINE1/TNFR<br>SF10A/TP53<br>AKT1/BAK1/BAX/CALM3/CCND1/<br>CDK4/CDK6/CDKN1A/CDKN2A/E2<br>F1/EGF/EGFR/IGF1R/MAPK1/MAP<br>K3/MDM2/MTOR/PRKCA/PRKCB/<br>PTEN/RAF1/RB1/TGFA/TP53<br>ACTA2/AKT1/COL1A1/COL3A1/C<br>REB1/EDN1/EGFR/FOS/GNAI1/GN<br>AI2/JUN/MAPK1/MAPK14/MAPK3/<br>MAPK8/MAPK9/MMP1/MMP2/MM<br>P9/NFKB1/NFKBIA/NOS1/NOS2/N<br>OS3/PRKCA/RAF1/RELA/SMAD2/S<br>RC/TGFB1/VEGFA<br>CCL2/CD40/CD40LG/CXCL8/ICAM<br>1/IFNG/IL10/IL12A/IL1B/IL6/KLRK<br>1/MYD88/PECAM1/SELE/SELP/TG<br>FB1/TGFB2/TLR4/TNF/VCAM1 | 24 |
| hsa<br>051<br>30 | Pathogenic<br>Escherichia<br>coli infection | 39/384 | 197/8115 | 9.57557<br>E-15 | 6.00468E<br>-14 | 2.3099E-<br>14  | S/FYN/IKKBK/IL1B/IL6/IRAK4/ITG<br>B1/JUN/MAP3K7/MAPK1/MAPK14/<br>MAPK3/MAPK8/MAPK9/MYD88/N<br>FKB1/NFKBIA/RAC1/RELA/SRC/T<br>LR4/TNF/TNFRSF10A/TRAF2<br>AKT1/BAD/BAK1/BAX/BCL2/BCL<br>2L1/BIRC5/BRCA1/CASP3/CASP8/<br>CASP9/CDKN1A/CDKN2A/CYCS/E<br>RBB2/FADD/GSTM1/GSTM2/GSTP<br>1/MAPK1/MAPK3/MDM2/TP53/XIA<br>P<br>BAX/BCL2/BCL2L1/CASP3/CASP8/<br>CASP9/CCNB1/CCND1/CCND2/CC<br>NE1/CDK2/CDK4/CDK6/CDKN1A/<br>CDKN2A/CHEK2/CYCS/IGFBP3/M<br>DM2/PTEN/RRM2/SERPINE1/TNFR<br>SF10A/TP53<br>AKT1/BAK1/BAX/CALM3/CCND1/<br>CDK4/CDK6/CDKN1A/CDKN2A/E2<br>F1/EGF/EGFR/IGF1R/MAPK1/MAP<br>K3/MDM2/MTOR/PRKCA/PRKCB/<br>PTEN/RAF1/RB1/TGFA/TP53<br>ACTA2/AKT1/COL1A1/COL3A1/C<br>REB1/EDN1/EGFR/FOS/GNAI1/GN<br>AI2/JUN/MAPK1/MAPK14/MAPK3/<br>MAPK8/MAPK9/MMP1/MMP2/MM<br>P9/NFKB1/NFKBIA/NOS1/NOS2/N<br>OS3/PRKCA/RAF1/RELA/SMAD2/S<br>RC/TGFB1/VEGFA<br>CCL2/CD40/CD40LG/CXCL8/ICAM<br>1/IFNG/IL10/IL12A/IL1B/IL6/KLRK<br>1/MYD88/PECAM1/SELE/SELP/TG<br>FB1/TGFB2/TLR4/TNF/VCAM1                                                                                                                                                                                                                                                  | 39 |
| hsa<br>015<br>24 | Platinum drug<br>resistance                 | 24/384 | 73/8115  | 1.09815<br>E-14 | 6.61084E<br>-14 | 2.54308E<br>-14 | AKT1/BAD/BAK1/BAX/BCL2/BCL<br>2L1/BIRC5/BRCA1/CASP3/CASP8/<br>CASP9/CDKN1A/CDKN2A/CYCS/E<br>RBB2/FADD/GSTM1/GSTM2/GSTP<br>1/MAPK1/MAPK3/MDM2/TP53/XIA<br>P<br>BAX/BCL2/BCL2L1/CASP3/CASP8/<br>CASP9/CCNB1/CCND1/CCND2/CC<br>NE1/CDK2/CDK4/CDK6/CDKN1A/<br>CDKN2A/CHEK2/CYCS/IGFBP3/M<br>DM2/PTEN/RRM2/SERPINE1/TNFR<br>SF10A/TP53<br>AKT1/BAK1/BAX/CALM3/CCND1/<br>CDK4/CDK6/CDKN1A/CDKN2A/E2<br>F1/EGF/EGFR/IGF1R/MAPK1/MAP<br>K3/MDM2/MTOR/PRKCA/PRKCB/<br>PTEN/RAF1/RB1/TGFA/TP53<br>ACTA2/AKT1/COL1A1/COL3A1/C<br>REB1/EDN1/EGFR/FOS/GNAI1/GN<br>AI2/JUN/MAPK1/MAPK14/MAPK3/<br>MAPK8/MAPK9/MMP1/MMP2/MM<br>P9/NFKB1/NFKBIA/NOS1/NOS2/N<br>OS3/PRKCA/RAF1/RELA/SMAD2/S<br>RC/TGFB1/VEGFA<br>CCL2/CD40/CD40LG/CXCL8/ICAM<br>1/IFNG/IL10/IL12A/IL1B/IL6/KLRK<br>1/MYD88/PECAM1/SELE/SELP/TG<br>FB1/TGFB2/TLR4/TNF/VCAM1                                                                                                                                                                                                                                                                                                                                                                                                          | 24 |
| hsa<br>041<br>15 | p53 signaling<br>pathway                    | 24/384 | 73/8115  | 1.09815<br>E-14 | 6.61084E<br>-14 | 2.54308E<br>-14 | AKT1/BAD/BAK1/BAX/BCL2/BCL<br>2L1/BIRC5/BRCA1/CASP3/CASP8/<br>CASP9/CDKN1A/CDKN2A/CYCS/E<br>RBB2/FADD/GSTM1/GSTM2/GSTP<br>1/MAPK1/MAPK3/MDM2/TP53/XIA<br>P<br>BAX/BCL2/BCL2L1/CASP3/CASP8/<br>CASP9/CCNB1/CCND1/CCND2/CC<br>NE1/CDK2/CDK4/CDK6/CDKN1A/<br>CDKN2A/CHEK2/CYCS/IGFBP3/M<br>DM2/PTEN/RRM2/SERPINE1/TNFR<br>SF10A/TP53<br>AKT1/BAK1/BAX/CALM3/CCND1/<br>CDK4/CDK6/CDKN1A/CDKN2A/E2<br>F1/EGF/EGFR/IGF1R/MAPK1/MAP<br>K3/MDM2/MTOR/PRKCA/PRKCB/<br>PTEN/RAF1/RB1/TGFA/TP53<br>ACTA2/AKT1/COL1A1/COL3A1/C<br>REB1/EDN1/EGFR/FOS/GNAI1/GN<br>AI2/JUN/MAPK1/MAPK14/MAPK3/<br>MAPK8/MAPK9/MMP1/MMP2/MM<br>P9/NFKB1/NFKBIA/NOS1/NOS2/N<br>OS3/PRKCA/RAF1/RELA/SMAD2/S<br>RC/TGFB1/VEGFA<br>CCL2/CD40/CD40LG/CXCL8/ICAM<br>1/IFNG/IL10/IL12A/IL1B/IL6/KLRK<br>1/MYD88/PECAM1/SELE/SELP/TG<br>FB1/TGFB2/TLR4/TNF/VCAM1                                                                                                                                                                                                                                                                                                                                                                                                          | 24 |
| hsa<br>052<br>14 | Glioma                                      | 24/384 | 75/8115  | 2.18987<br>E-14 | 1.29245E<br>-13 | 4.97184E<br>-14 | AKT1/BAD/BAK1/BAX/BCL2/BCL<br>2L1/BIRC5/BRCA1/CASP3/CASP8/<br>CASP9/CDKN1A/CDKN2A/CYCS/E<br>RBB2/FADD/GSTM1/GSTM2/GSTP<br>1/MAPK1/MAPK3/MDM2/TP53/XIA<br>P<br>BAX/BCL2/BCL2L1/CASP3/CASP8/<br>CASP9/CCNB1/CCND1/CCND2/CC<br>NE1/CDK2/CDK4/CDK6/CDKN1A/<br>CDKN2A/CHEK2/CYCS/IGFBP3/M<br>DM2/PTEN/RRM2/SERPINE1/TNFR<br>SF10A/TP53<br>AKT1/BAK1/BAX/CALM3/CCND1/<br>CDK4/CDK6/CDKN1A/CDKN2A/E2<br>F1/EGF/EGFR/IGF1R/MAPK1/MAP<br>K3/MDM2/MTOR/PRKCA/PRKCB/<br>PTEN/RAF1/RB1/TGFA/TP53<br>ACTA2/AKT1/COL1A1/COL3A1/C<br>REB1/EDN1/EGFR/FOS/GNAI1/GN<br>AI2/JUN/MAPK1/MAPK14/MAPK3/<br>MAPK8/MAPK9/MMP1/MMP2/MM<br>P9/NFKB1/NFKBIA/NOS1/NOS2/N<br>OS3/PRKCA/RAF1/RELA/SMAD2/S<br>RC/TGFB1/VEGFA<br>CCL2/CD40/CD40LG/CXCL8/ICAM<br>1/IFNG/IL10/IL12A/IL1B/IL6/KLRK<br>1/MYD88/PECAM1/SELE/SELP/TG<br>FB1/TGFB2/TLR4/TNF/VCAM1                                                                                                                                                                                                                                                                                                                                                                                                          | 24 |
| hsa<br>049<br>26 | Relaxin<br>signaling<br>pathway             | 31/384 | 129/8115 | 2.35491<br>E-14 | 1.36313E<br>-13 | 5.24373E<br>-14 | AKT1/BAD/BAK1/BAX/BCL2/BCL<br>2L1/BIRC5/BRCA1/CASP3/CASP8/<br>CASP9/CDKN1A/CDKN2A/CYCS/E<br>RBB2/FADD/GSTM1/GSTM2/GSTP<br>1/MAPK1/MAPK3/MDM2/TP53/XIA<br>P<br>BAX/BCL2/BCL2L1/CASP3/CASP8/<br>CASP9/CCNB1/CCND1/CCND2/CC<br>NE1/CDK2/CDK4/CDK6/CDKN1A/<br>CDKN2A/CHEK2/CYCS/IGFBP3/M<br>DM2/PTEN/RRM2/SERPINE1/TNFR<br>SF10A/TP53<br>AKT1/BAK1/BAX/CALM3/CCND1/<br>CDK4/CDK6/CDKN1A/CDKN2A/E2<br>F1/EGF/EGFR/IGF1R/MAPK1/MAP<br>K3/MDM2/MTOR/PRKCA/PRKCB/<br>PTEN/RAF1/RB1/TGFA/TP53<br>ACTA2/AKT1/COL1A1/COL3A1/C<br>REB1/EDN1/EGFR/FOS/GNAI1/GN<br>AI2/JUN/MAPK1/MAPK14/MAPK3/<br>MAPK8/MAPK9/MMP1/MMP2/MM<br>P9/NFKB1/NFKBIA/NOS1/NOS2/N<br>OS3/PRKCA/RAF1/RELA/SMAD2/S<br>RC/TGFB1/VEGFA<br>CCL2/CD40/CD40LG/CXCL8/ICAM<br>1/IFNG/IL10/IL12A/IL1B/IL6/KLRK<br>1/MYD88/PECAM1/SELE/SELP/TG<br>FB1/TGFB2/TLR4/TNF/VCAM1                                                                                                                                                                                                                                                                                                                                                                                                          | 31 |
| hsa<br>051<br>44 | Malaria                                     | 20/384 | 50/8115  | 2.48511<br>E-14 | 1.41135E<br>-13 | 5.42923E<br>-14 | AKT1/BAD/BAK1/BAX/BCL2/BCL<br>2L1/BIRC5/BRCA1/CASP3/CASP8/<br>CASP9/CDKN1A/CDKN2A/CYCS/E<br>RBB2/FADD/GSTM1/GSTM2/GSTP<br>1/MAPK1/MAPK3/MDM2/TP53/XIA<br>P<br>BAX/BCL2/BCL2L1/CASP3/CASP8/<br>CASP9/CCNB1/CCND1/CCND2/CC<br>NE1/CDK2/CDK4/CDK6/CDKN1A/<br>CDKN2A/CHEK2/CYCS/IGFBP3/M<br>DM2/PTEN/RRM2/SERPINE1/TNFR<br>SF10A/TP53<br>AKT1/BAK1/BAX/CALM3/CCND1/<br>CDK4/CDK6/CDKN1A/CDKN2A/E2<br>F1/EGF/EGFR/IGF1R/MAPK1/MAP<br>K3/MDM2/MTOR/PRKCA/PRKCB/<br>PTEN/RAF1/RB1/TGFA/TP53<br>ACTA2/AKT1/COL1A1/COL3A1/C<br>REB1/EDN1/EGFR/FOS/GNAI1/GN<br>AI2/JUN/MAPK1/MAPK14/MAPK3/<br>MAPK8/MAPK9/MMP1/MMP2/MM<br>P9/NFKB1/NFKBIA/NOS1/NOS2/N<br>OS3/PRKCA/RAF1/RELA/SMAD2/S<br>RC/TGFB1/VEGFA<br>CCL2/CD40/CD40LG/CXCL8/ICAM<br>1/IFNG/IL10/IL12A/IL1B/IL6/KLRK<br>1/MYD88/PECAM1/SELE/SELP/TG<br>FB1/TGFB2/TLR4/TNF/VCAM1                                                                                                                                                                                                                                                                                                                                                                                                          | 20 |

|                  |                                                       |        |          |                 |                 |                 |                                                                                                                                                                                                                                                                                                                                                                                                                                                                                                                                                                           |    |
|------------------|-------------------------------------------------------|--------|----------|-----------------|-----------------|-----------------|---------------------------------------------------------------------------------------------------------------------------------------------------------------------------------------------------------------------------------------------------------------------------------------------------------------------------------------------------------------------------------------------------------------------------------------------------------------------------------------------------------------------------------------------------------------------------|----|
| hsa<br>052<br>24 | Breast cancer                                         | 33/384 | 147/8115 | 2.76278<br>E-14 | 1.53999E<br>-13 | 5.92408E<br>-14 | AKT1/BAK1/BAX/BRCA1/BRCA2/<br>CCND1/CDK4/CDK6/CDKN1A/CT<br>NNB1/E2F1/EGF/EGFR/ERBB2/ESR<br>1/ESR2/FGF2/FGF7/FOS/GSK3B/IG<br>F1R/JUN/MAPK1/MAPK3/MTOR/M<br>YC/NCOA1/PGR/PTEN/RAF1/RB1/<br>TP53/WNT4<br>ADIPOR1/ADIPOR2/AKT1/IKBKB/I<br>RS1/MAPK8/MAPK9/MTOR/NFKB<br>1/NFKBIA/NPY/POMC/PPARA/PPA<br>RGC1A/PRKAA1/PRKAA2/PRKAG<br>2/RELA/RXRA/SLC2A4/STAT3/TN<br>F/TRAF2                                                                                                                                                                                                     | 33 |
| hsa<br>049<br>20 | Adipocytokin<br>e signaling<br>pathway                | 23/384 | 69/8115  | 2.84613<br>E-14 | 1.55761E<br>-13 | 5.99185E<br>-14 | AKT1/CCND1/CCND2/ESR1/ESR2/<br>FOS/GSK3B/INS/IRF1/LHCGR/MAP<br>K1/MAPK14/MAPK3/MAPK8/MAP<br>K9/NFKB1/RAF1/RELA/SLC2A2/SR<br>C/STAT1/STAT3/TH                                                                                                                                                                                                                                                                                                                                                                                                                              | 23 |
| hsa<br>049<br>17 | Prolactin<br>signaling<br>pathway                     | 23/384 | 70/8115  | 4.0574E<br>-14  | 2.18085E<br>-13 | 8.38937E<br>-14 | AKT1/BAD/BAX/BCL2/BCL2L1/BC<br>L2L11/EGF/EGFR/ERBB2/FGF2/GS<br>K3B/IGF1R/IL6/MAPK1/MAPK3/M<br>TOR/PRKCA/PRKCB/PTEN/RAF1/S<br>RC/STAT3/TGFA/VEGFA                                                                                                                                                                                                                                                                                                                                                                                                                          | 23 |
| hsa<br>015<br>21 | EGFR<br>tyrosine<br>kinase<br>inhibitor<br>resistance | 24/384 | 79/8115  | 8.09864<br>E-14 | 4.27665E<br>-13 | 1.64515E<br>-13 | AKT1/BAD/BAK1/BAX/CASP3/CA<br>SP8/CCNA2/CCND1/CCND2/CCNE<br>1/CDC42/CDK2/CDK4/CDK6/CDKN<br>1A/COL1A1/COL2A1/CREB1/CTNN<br>B1/E2F1/EGF/EGFR/FADD/FN1/FO<br>XO1/GSK3B/HLA-A/HLA-B/HLA-C<br>/HLA-G/IKBKB/IRF1/ITGB1/MAPK<br>1/MAPK3/MDM2/MTOR/NFKB1/PT<br>EN/PTGS2/RAF1/RB1/RELA/SPP1/S<br>TAT1/TNF/TP53/VEGFA/VWF/WN<br>T4<br>ACE/AGT/AKT1/ATP5F1B/COL1A1<br>/COL3A1/CTSD/G6PD/GSK3B/INS/I<br>NSR/IRS1/MAPK14/MAPK8/MAPK<br>9/MMP2/MMP9/MTOR/NCF1/NFKB<br>1/NOS3/PARP1/PPARA/PPIF/PRKC<br>A/PRKCB/PRKCD/PTEN/RAC1/RE<br>LA/REN/SDHA/SDHB/SLC2A4/SM<br>AD2/SMAD3/TGFB1/TGFB2 | 24 |
| hsa<br>051<br>65 | Human<br>papillomaviru<br>s infection                 | 50/384 | 331/8115 | 1.12125<br>E-13 | 5.81889E<br>-13 | 2.23843E<br>-13 | AKT1/BAD/BAK1/BAX/CASP3/CA<br>SP8/CCNA2/CCND1/CCND2/CCNE<br>1/CDC42/CDK2/CDK4/CDK6/CDKN<br>1A/COL1A1/COL2A1/CREB1/CTNN<br>B1/E2F1/EGF/EGFR/FADD/FN1/FO<br>XO1/GSK3B/HLA-A/HLA-B/HLA-C<br>/HLA-G/IKBKB/IRF1/ITGB1/MAPK<br>1/MAPK3/MDM2/MTOR/NFKB1/PT<br>EN/PTGS2/RAF1/RB1/RELA/SPP1/S<br>TAT1/TNF/TP53/VEGFA/VWF/WN<br>T4<br>ACE/AGT/AKT1/ATP5F1B/COL1A1<br>/COL3A1/CTSD/G6PD/GSK3B/INS/I<br>NSR/IRS1/MAPK14/MAPK8/MAPK<br>9/MMP2/MMP9/MTOR/NCF1/NFKB<br>1/NOS3/PARP1/PPARA/PPIF/PRKC<br>A/PRKCB/PRKCD/PTEN/RAC1/RE<br>LA/REN/SDHA/SDHB/SLC2A4/SM<br>AD2/SMAD3/TGFB1/TGFB2 | 50 |
| hsa<br>054<br>15 | Diabetic<br>cardiomyopat<br>hy                        | 38/384 | 203/8115 | 1.41012<br>E-13 | 7.19402E<br>-13 | 2.76741E<br>-13 | AKT1/BAD/BAK1/BAX/CASP3/CA<br>SP8/CCNA2/CCND1/CCND2/CCNE<br>1/CDC42/CDK2/CDK4/CDK6/CDKN<br>1A/COL1A1/COL2A1/CREB1/CTNN<br>B1/E2F1/EGF/EGFR/FADD/FN1/FO<br>XO1/GSK3B/HLA-A/HLA-B/HLA-C<br>/HLA-G/IKBKB/IRF1/ITGB1/MAPK<br>1/MAPK3/MDM2/MTOR/NFKB1/PT<br>EN/PTGS2/RAF1/RB1/RELA/SPP1/S<br>TAT1/TNF/TP53/VEGFA/VWF/WN<br>T4<br>ACE/AGT/AKT1/ATP5F1B/COL1A1<br>/COL3A1/CTSD/G6PD/GSK3B/INS/I<br>NSR/IRS1/MAPK14/MAPK8/MAPK<br>9/MMP2/MMP9/MTOR/NCF1/NFKB<br>1/NOS3/PARP1/PPARA/PPIF/PRKC<br>A/PRKCB/PRKCD/PTEN/RAC1/RE<br>LA/REN/SDHA/SDHB/SLC2A4/SM<br>AD2/SMAD3/TGFB1/TGFB2 | 38 |

|                  |                                         |        |          |                 |                 |                 |                                                                                                                                                                                                                                                                                                                                                                                                                                                                                                                                                                                                                                                                                                                                                                                                                                                                                                                                                                                                                                                                                                                                                                                                                             |    |
|------------------|-----------------------------------------|--------|----------|-----------------|-----------------|-----------------|-----------------------------------------------------------------------------------------------------------------------------------------------------------------------------------------------------------------------------------------------------------------------------------------------------------------------------------------------------------------------------------------------------------------------------------------------------------------------------------------------------------------------------------------------------------------------------------------------------------------------------------------------------------------------------------------------------------------------------------------------------------------------------------------------------------------------------------------------------------------------------------------------------------------------------------------------------------------------------------------------------------------------------------------------------------------------------------------------------------------------------------------------------------------------------------------------------------------------------|----|
| hsa<br>052<br>03 | Viral<br>carcinogenesis                 | 38/384 | 204/8115 | 1.65956<br>E-13 | 8.32547E<br>-13 | 3.20266E<br>-13 | BAD/BAK1/BAX/C3/CASP3/CASP8<br>/CCNA2/CCND1/CCND2/CCNE1/C<br>CR3/CCR4/CCR5/CCR8/CDC42/CD<br>K2/CDK4/CDK6/CDKN1A/CDKN2<br>A/CREB1/HLA-A/HLA-B/HLA-C/H<br>LA-G/JUN/MAPK1/MAPK3/MDM2/<br>NFKB1/NFKBIA/RAC1/RB1/RELA/<br>SRC/STAT3/TP53/TRAF2<br>ACE/ADAR/C3/C3AR1/C5/C5AR1/C<br>ASP1/CCL2/CXCL10/CXCL8/EGFR/<br>F2/FOS/IKBKB/IL12A/IL12B/IL1B/I<br>L2/IL6/IRAK4/JUN/MAP3K7/MAPK<br>1/MAPK14/MAPK3/MAPK8/MAPK<br>9/MMP1/MYD88/NFKB1/NFKBIA/P<br>RKCA/PRKCB/RELA/SELP/STAT1/<br>STAT3/TLR4/TNF/VWF<br>CCL2/CCL20/CD28/CD80/CD86/CX<br>CL1/CXCL12/CXCL2/CXCL3/CXCL<br>5/CXCL6/CXCL8/FOS/ICAM1/IFNG<br>/IL1A/IL1B/IL6/JUN/MMP1/TGFB1/<br>TGFB2/TLR4/TNF/VEGFA<br>IFNG/IL10/IL12A/IL12B/IL13/IL1A/<br>IL1B/IL2/IL4/IL6/JUN/NFKB1/REL<br>A/SMAD2/SMAD3/STAT1/STAT3/T<br>GFB1/TGFB2/TLR4/TNF<br>AKT1/BAD/BAK1/BAX/CCND1/CD<br>K4/CDK6/CDKN1A/CDKN2A/E2F1/<br>EGF/EGFR/FGF2/FGF7/IGF1R/MAP<br>K1/MAPK3/MDM2/PTEN/RAF1/RB<br>1/TP53<br>AKT1/CD28/CD40LG/CDC42/CDK4<br>/FOS/FYN/GSK3B/IFNG/IKBKB/IL1<br>0/IL2/IL4/JUN/MAP3K7/MAPK1/M<br>APK14/MAPK3/MAPK8/MAPK9/NF<br>KB1/NFKBIA/RAF1/RASGRP1/REL<br>A/TNF<br>ACTB/ACTG1/CASP3/CASP8/CASP<br>9/CAV1/CCND1/CD28/CD40/CD40L<br>G/CD80/CD86/CYCS/FYN/HLA-A/H<br>LA-B/HLA-C/HLA-G/ICAM1/RAC1 | 38 |
| hsa<br>051<br>71 | Coronavirus<br>disease -<br>COVID-19    | 40/384 | 232/8115 | 5.18972<br>E-13 | 2.56083E<br>-12 | 9.85107E<br>-13 | L2/IL6/IRAK4/JUN/MAP3K7/MAPK<br>1/MAPK14/MAPK3/MAPK8/MAPK<br>9/MMP1/MYD88/NFKB1/NFKBIA/P<br>RKCA/PRKCB/RELA/SELP/STAT1/<br>STAT3/TLR4/TNF/VWF<br>CCL2/CCL20/CD28/CD80/CD86/CX<br>CL1/CXCL12/CXCL2/CXCL3/CXCL<br>5/CXCL6/CXCL8/FOS/ICAM1/IFNG<br>/IL1A/IL1B/IL6/JUN/MMP1/TGFB1/<br>TGFB2/TLR4/TNF/VEGFA<br>IFNG/IL10/IL12A/IL12B/IL13/IL1A/<br>IL1B/IL2/IL4/IL6/JUN/NFKB1/REL<br>A/SMAD2/SMAD3/STAT1/STAT3/T<br>GFB1/TGFB2/TLR4/TNF<br>AKT1/BAD/BAK1/BAX/CCND1/CD<br>K4/CDK6/CDKN1A/CDKN2A/E2F1/<br>EGF/EGFR/FGF2/FGF7/IGF1R/MAP<br>K1/MAPK3/MDM2/PTEN/RAF1/RB<br>1/TP53<br>AKT1/CD28/CD40LG/CDC42/CDK4<br>/FOS/FYN/GSK3B/IFNG/IKBKB/IL1<br>0/IL2/IL4/JUN/MAP3K7/MAPK1/M<br>APK14/MAPK3/MAPK8/MAPK9/NF<br>KB1/NFKBIA/RAF1/RASGRP1/REL<br>A/TNF<br>ACTB/ACTG1/CASP3/CASP8/CASP<br>9/CAV1/CCND1/CD28/CD40/CD40L<br>G/CD80/CD86/CYCS/FYN/HLA-A/H<br>LA-B/HLA-C/HLA-G/ICAM1/RAC1                                                                                                                                                                                                                                                                                                                                                 | 40 |
| hsa<br>053<br>23 | Rheumatoid<br>arthritis                 | 25/384 | 93/8115  | 5.41582<br>E-13 | 2.62929E<br>-12 | 1.01144E<br>-12 | L2/IL6/IRAK4/JUN/MAP3K7/MAPK<br>1/MAPK14/MAPK3/MAPK8/MAPK<br>9/MMP1/MYD88/NFKB1/NFKBIA/P<br>RKCA/PRKCB/RELA/SELP/STAT1/<br>STAT3/TLR4/TNF/VWF<br>CCL2/CCL20/CD28/CD80/CD86/CX<br>CL1/CXCL12/CXCL2/CXCL3/CXCL<br>5/CXCL6/CXCL8/FOS/ICAM1/IFNG<br>/IL1A/IL1B/IL6/JUN/MMP1/TGFB1/<br>TGFB2/TLR4/TNF/VEGFA<br>IFNG/IL10/IL12A/IL12B/IL13/IL1A/<br>IL1B/IL2/IL4/IL6/JUN/NFKB1/REL<br>A/SMAD2/SMAD3/STAT1/STAT3/T<br>GFB1/TGFB2/TLR4/TNF<br>AKT1/BAD/BAK1/BAX/CCND1/CD<br>K4/CDK6/CDKN1A/CDKN2A/E2F1/<br>EGF/EGFR/FGF2/FGF7/IGF1R/MAP<br>K1/MAPK3/MDM2/PTEN/RAF1/RB<br>1/TP53<br>AKT1/CD28/CD40LG/CDC42/CDK4<br>/FOS/FYN/GSK3B/IFNG/IKBKB/IL1<br>0/IL2/IL4/JUN/MAP3K7/MAPK1/M<br>APK14/MAPK3/MAPK8/MAPK9/NF<br>KB1/NFKBIA/RAF1/RASGRP1/REL<br>A/TNF<br>ACTB/ACTG1/CASP3/CASP8/CASP<br>9/CAV1/CCND1/CD28/CD40/CD40L<br>G/CD80/CD86/CYCS/FYN/HLA-A/H<br>LA-B/HLA-C/HLA-G/ICAM1/RAC1                                                                                                                                                                                                                                                                                                                                                 | 25 |
| hsa<br>053<br>21 | Inflammatory<br>bowel disease           | 21/384 | 65/8115  | 7.80274<br>E-13 | 3.72797E<br>-12 | 1.43409E<br>-12 | L2/IL6/IRAK4/JUN/MAP3K7/MAPK<br>1/MAPK14/MAPK3/MAPK8/MAPK<br>9/MMP1/MYD88/NFKB1/NFKBIA/P<br>RKCA/PRKCB/RELA/SELP/STAT1/<br>STAT3/TLR4/TNF/VWF<br>CCL2/CCL20/CD28/CD80/CD86/CX<br>CL1/CXCL12/CXCL2/CXCL3/CXCL<br>5/CXCL6/CXCL8/FOS/ICAM1/IFNG<br>/IL1A/IL1B/IL6/JUN/MMP1/TGFB1/<br>TGFB2/TLR4/TNF/VEGFA<br>IFNG/IL10/IL12A/IL12B/IL13/IL1A/<br>IL1B/IL2/IL4/IL6/JUN/NFKB1/REL<br>A/SMAD2/SMAD3/STAT1/STAT3/T<br>GFB1/TGFB2/TLR4/TNF<br>AKT1/BAD/BAK1/BAX/CCND1/CD<br>K4/CDK6/CDKN1A/CDKN2A/E2F1/<br>EGF/EGFR/FGF2/FGF7/IGF1R/MAP<br>K1/MAPK3/MDM2/PTEN/RAF1/RB<br>1/TP53<br>AKT1/CD28/CD40LG/CDC42/CDK4<br>/FOS/FYN/GSK3B/IFNG/IKBKB/IL1<br>0/IL2/IL4/JUN/MAP3K7/MAPK1/M<br>APK14/MAPK3/MAPK8/MAPK9/NF<br>KB1/NFKBIA/RAF1/RASGRP1/REL<br>A/TNF<br>ACTB/ACTG1/CASP3/CASP8/CASP<br>9/CAV1/CCND1/CD28/CD40/CD40L<br>G/CD80/CD86/CYCS/FYN/HLA-A/H<br>LA-B/HLA-C/HLA-G/ICAM1/RAC1                                                                                                                                                                                                                                                                                                                                                 | 21 |
| hsa<br>052<br>18 | Melanoma                                | 22/384 | 72/8115  | 7.94323<br>E-13 | 3.7358E-<br>12  | 1.4371E-<br>12  | L2/IL6/IRAK4/JUN/MAP3K7/MAPK<br>1/MAPK14/MAPK3/MAPK8/MAPK<br>9/MMP1/MYD88/NFKB1/NFKBIA/P<br>RKCA/PRKCB/RELA/SELP/STAT1/<br>STAT3/TLR4/TNF/VWF<br>CCL2/CCL20/CD28/CD80/CD86/CX<br>CL1/CXCL12/CXCL2/CXCL3/CXCL<br>5/CXCL6/CXCL8/FOS/ICAM1/IFNG<br>/IL1A/IL1B/IL6/JUN/MMP1/TGFB1/<br>TGFB2/TLR4/TNF/VEGFA<br>IFNG/IL10/IL12A/IL12B/IL13/IL1A/<br>IL1B/IL2/IL4/IL6/JUN/NFKB1/REL<br>A/SMAD2/SMAD3/STAT1/STAT3/T<br>GFB1/TGFB2/TLR4/TNF<br>AKT1/BAD/BAK1/BAX/CCND1/CD<br>K4/CDK6/CDKN1A/CDKN2A/E2F1/<br>EGF/EGFR/FGF2/FGF7/IGF1R/MAP<br>K1/MAPK3/MDM2/PTEN/RAF1/RB<br>1/TP53<br>AKT1/CD28/CD40LG/CDC42/CDK4<br>/FOS/FYN/GSK3B/IFNG/IKBKB/IL1<br>0/IL2/IL4/JUN/MAP3K7/MAPK1/M<br>APK14/MAPK3/MAPK8/MAPK9/NF<br>KB1/NFKBIA/RAF1/RASGRP1/REL<br>A/TNF<br>ACTB/ACTG1/CASP3/CASP8/CASP<br>9/CAV1/CCND1/CD28/CD40/CD40L<br>G/CD80/CD86/CYCS/FYN/HLA-A/H<br>LA-B/HLA-C/HLA-G/ICAM1/RAC1                                                                                                                                                                                                                                                                                                                                                 | 22 |
| hsa<br>046<br>60 | T cell receptor<br>signaling<br>pathway | 26/384 | 104/8115 | 1.1676E<br>-12  | 5.40689E<br>-12 | 2.07994E<br>-12 | L2/IL6/IRAK4/JUN/MAP3K7/MAPK<br>1/MAPK14/MAPK3/MAPK8/MAPK<br>9/MMP1/MYD88/NFKB1/NFKBIA/P<br>RKCA/PRKCB/RELA/SELP/STAT1/<br>STAT3/TLR4/TNF/VWF<br>CCL2/CCL20/CD28/CD80/CD86/CX<br>CL1/CXCL12/CXCL2/CXCL3/CXCL<br>5/CXCL6/CXCL8/FOS/ICAM1/IFNG<br>/IL1A/IL1B/IL6/JUN/MMP1/TGFB1/<br>TGFB2/TLR4/TNF/VEGFA<br>IFNG/IL10/IL12A/IL12B/IL13/IL1A/<br>IL1B/IL2/IL4/IL6/JUN/NFKB1/REL<br>A/SMAD2/SMAD3/STAT1/STAT3/T<br>GFB1/TGFB2/TLR4/TNF<br>AKT1/BAD/BAK1/BAX/CCND1/CD<br>K4/CDK6/CDKN1A/CDKN2A/E2F1/<br>EGF/EGFR/FGF2/FGF7/IGF1R/MAP<br>K1/MAPK3/MDM2/PTEN/RAF1/RB<br>1/TP53<br>AKT1/CD28/CD40LG/CDC42/CDK4<br>/FOS/FYN/GSK3B/IFNG/IKBKB/IL1<br>0/IL2/IL4/JUN/MAP3K7/MAPK1/M<br>APK14/MAPK3/MAPK8/MAPK9/NF<br>KB1/NFKBIA/RAF1/RASGRP1/REL<br>A/TNF<br>ACTB/ACTG1/CASP3/CASP8/CASP<br>9/CAV1/CCND1/CD28/CD40/CD40L<br>G/CD80/CD86/CYCS/FYN/HLA-A/H<br>LA-B/HLA-C/HLA-G/ICAM1/RAC1                                                                                                                                                                                                                                                                                                                                                 | 26 |
| hsa<br>054<br>16 | Viral<br>myocarditis                    | 20/384 | 60/8115  | 1.42665<br>E-12 | 6.5064E-<br>12  | 2.5029E-<br>12  | L2/IL6/IRAK4/JUN/MAP3K7/MAPK<br>1/MAPK14/MAPK3/MAPK8/MAPK<br>9/MMP1/MYD88/NFKB1/NFKBIA/P<br>RKCA/PRKCB/RELA/SELP/STAT1/<br>STAT3/TLR4/TNF/VWF<br>CCL2/CCL20/CD28/CD80/CD86/CX<br>CL1/CXCL12/CXCL2/CXCL3/CXCL<br>5/CXCL6/CXCL8/FOS/ICAM1/IFNG<br>/IL1A/IL1B/IL6/JUN/MMP1/TGFB1/<br>TGFB2/TLR4/TNF/VEGFA<br>IFNG/IL10/IL12A/IL12B/IL13/IL1A/<br>IL1B/IL2/IL4/IL6/JUN/NFKB1/REL<br>A/SMAD2/SMAD3/STAT1/STAT3/T<br>GFB1/TGFB2/TLR4/TNF<br>AKT1/BAD/BAK1/BAX/CCND1/CD<br>K4/CDK6/CDKN1A/CDKN2A/E2F1/<br>EGF/EGFR/FGF2/FGF7/IGF1R/MAP<br>K1/MAPK3/MDM2/PTEN/RAF1/RB<br>1/TP53<br>AKT1/CD28/CD40LG/CDC42/CDK4<br>/FOS/FYN/GSK3B/IFNG/IKBKB/IL1<br>0/IL2/IL4/JUN/MAP3K7/MAPK1/M<br>APK14/MAPK3/MAPK8/MAPK9/NF<br>KB1/NFKBIA/RAF1/RASGRP1/REL<br>A/TNF<br>ACTB/ACTG1/CASP3/CASP8/CASP<br>9/CAV1/CCND1/CD28/CD40/CD40L<br>G/CD80/CD86/CYCS/FYN/HLA-A/H<br>LA-B/HLA-C/HLA-G/ICAM1/RAC1                                                                                                                                                                                                                                                                                                                                                 | 20 |



|                  |                                                             |        |          |                 |                 |                 |                                                                                                                                                                                                                               |    |
|------------------|-------------------------------------------------------------|--------|----------|-----------------|-----------------|-----------------|-------------------------------------------------------------------------------------------------------------------------------------------------------------------------------------------------------------------------------|----|
| hsa<br>045<br>10 | Focal<br>adhesion                                           | 36/384 | 201/8115 | 2.54316<br>E-12 | 1.14252E<br>-11 | 4.39509E<br>-12 | ACTB/ACTG1/AKT1/BAD/BCL2/C<br>AV1/CCND1/CCND2/CDC42/COL1<br>A1/COL2A1/CTNNB1/EGF/EGFR/E<br>RBB2/FN1/FYN/GSK3B/IGF1R/ITG<br>B1/JUN/MAPK1/MAPK3/MAPK8/M<br>APK9/MYLK/PRKCA/PRKCB/PTE<br>N/RAC1/RAF1/SPP1/SRC/VEGFA/V<br>WF/XIAP | 36 |
| hsa<br>042<br>15 | Apoptosis -<br>multiple<br>species                          | 15/384 | 32/8115  | 2.76383<br>E-12 | 1.2234E-<br>11  | 4.70621E<br>-12 | BAK1/BAX/BCL2/BCL2L1/BCL2L1<br>1/BIRC5/CASP3/CASP7/CASP8/CA<br>SP9/CYCS/FADD/MAPK8/MAPK9/<br>XIAP                                                                                                                             | 15 |
| hsa<br>046<br>59 | Th17 cell<br>differentiation                                | 26/384 | 108/8115 | 3.00344<br>E-12 | 1.3102E-<br>11  | 5.04011E<br>-12 | AHR/FOS/HIF1A/IFNG/IKBKB/IL1<br>B/IL2/IL2RA/IL4/IL6/JUN/MAPK1/<br>MAPK14/MAPK3/MAPK8/MAPK9/<br>MTOR/NFKB1/NFKBIA/RELA/RXR<br>A/SMAD2/SMAD3/STAT1/STAT3/T<br>GFB1                                                              | 26 |
| hsa<br>053<br>30 | Allograft<br>rejection                                      | 16/384 | 38/8115  | 3.97438<br>E-12 | 1.70899E<br>-11 | 6.57417E<br>-12 | CD28/CD40/CD40LG/CD80/CD86/H<br>LA-A/HLA-B/HLA-C/HLA-G/IFNG/<br>IL10/IL12A/IL12B/IL2/IL4/TNF                                                                                                                                  | 16 |
| hsa<br>040<br>71 | Sphingolipid<br>signaling<br>pathway                        | 27/384 | 119/8115 | 5.13518<br>E-12 | 2.17703E<br>-11 | 8.37465E<br>-12 | AKT1/BAX/BCL2/CTSD/FYN/GNAI<br>1/GNAI2/MAPK1/MAPK14/MAPK3/<br>MAPK8/MAPK9/NFKB1/NOS3/PRK<br>CA/PRKCB/PTEN/RAC1/RAF1/REL<br>A/S1PR1/S1PR2/S1PR3/SPHK1/TNF<br>/TP53/TRAF2                                                       | 27 |
| hsa<br>049<br>19 | Thyroid<br>hormone<br>signaling<br>pathway                  | 27/384 | 121/8115 | 7.81524<br>E-12 | 3.26721E<br>-11 | 1.25684E<br>-11 | ACTB/ACTG1/AKT1/BAD/BMP4/C<br>ASP9/CCND1/CTNNB1/ESR1/FOX<br>O1/GSK3B/HIF1A/MAPK1/MAPK3/<br>MDM2/MTOR/MYC/NCOA1/PRKC<br>A/PRKCB/RAF1/RXRA/SRC/STAT1<br>/THRB/TP53/WNT4                                                         | 27 |
| hsa<br>052<br>26 | Gastric cancer                                              | 30/384 | 149/8115 | 8.58366<br>E-12 | 3.53929E<br>-11 | 1.3615E-<br>11  | ABCB1/AKT1/BAK1/BAX/BCL2/C<br>CND1/CCNE1/CDK2/CDKN1A/CTN<br>NB1/E2F1/EGF/EGFR/ERBB2/FGF2/<br>FGF7/GSK3B/MAPK1/MAPK3/MTO<br>R/MYC/RAF1/RB1/RXRA/SMAD2/S<br>MAD3/TGFB1/TGFB2/TP53/WNT4                                          | 30 |
| hsa<br>052<br>35 | PD-L1<br>expression<br>and PD-1<br>checkpoint<br>pathway in | 23/384 | 89/8115  | 1.15644<br>E-11 | 4.70389E<br>-11 | 1.80951E<br>-11 | AKT1/CD28/EGF/EGFR/FOS/HIF1A<br>/IFNG/IKBKB/JUN/MAPK1/MAPK1<br>4/MAPK3/MTOR/MYD88/NFKB1/N<br>FKBIA/PTEN/RAF1/RASGRP1/REL<br>A/STAT1/STAT3/TLR4                                                                                | 23 |

cancer

|                  |                              |        |          |                 |                 |                 |                                                                                                                                                                                                                                                                                                                                                                                                                                                                                                                                                                                                                                                                                                                                                                                                                                                                                                                                                                                                                                                                                                                                                                                                                                                     |    |
|------------------|------------------------------|--------|----------|-----------------|-----------------|-----------------|-----------------------------------------------------------------------------------------------------------------------------------------------------------------------------------------------------------------------------------------------------------------------------------------------------------------------------------------------------------------------------------------------------------------------------------------------------------------------------------------------------------------------------------------------------------------------------------------------------------------------------------------------------------------------------------------------------------------------------------------------------------------------------------------------------------------------------------------------------------------------------------------------------------------------------------------------------------------------------------------------------------------------------------------------------------------------------------------------------------------------------------------------------------------------------------------------------------------------------------------------------|----|
| hsa<br>051<br>31 | Shigellosis                  | 39/384 | 247/8115 | 1.7726E<br>-11  | 7.11402E<br>-11 | 2.73664E<br>-11 | ACTB/ACTG1/AKT1/ARF1/BAX/B<br>CL2/BCL2L1/C3/CASP1/CDC42/CX<br>CL8/CYCS/EGFR/FOXO1/GSK3A/G<br>SK3B/IKBKB/IL1B/ITGB1/JUN/MA<br>P3K7/MAPK1/MAPK14/MAPK3/M<br>APK8/MAPK9/MDM2/MTOR/MYD<br>88/NFKB1/NFKBIA/PRKCD/RAC1/<br>RELA/SRC/TLR4/TNF/TP53/TRAF2<br>ACTB/ACTG1/AKT1/ARF1/BAK1/B<br>AX/BCL2/CASP1/CASP3/CASP7/C<br>ASP8/CDC42/CTNNB1/CXCL8/CYC<br>S/FADD/FOS/IKBKB/IL1B/IL6/IRA<br>K4/JUN/MAP3K7/MAPK1/MAPK14/<br>MAPK3/MAPK8/MAPK9/MYC/MY<br>D88/NFKB1/NFKBIA/RAC1/RAF1/<br>RELA/TLR4/TNF/TNFRSF10A/TRA<br>F2<br>CASP3/COL1A1/COL3A1/CXCL1/C<br>XCL2/CXCL3/CXCL8/FN1/HSPB1/I<br>FNG/IL10/IL12A/IL12B/IL1B/IL6/N<br>FKB1/NOS2/PRKCA/PRKCB/RELA/<br>TGFB1/TGFB2/TLR4/TNF<br>ADRB1/ADRB2/AKT1/BAD/CALM<br>3/CHRM1/CHRM2/CREB1/DRD2/E<br>DN1/FOS/GCG/GHRL/GNAI1/GNAI<br>2/HCAR2/HCAR3/JUN/LHCGR/MA<br>PK1/MAPK3/MAPK8/MAPK9/NFK<br>B1/NFKBIA/NPPA/NPY/OXT/POM<br>C/PPARA/PTGER3/RAC1/RAF1/RE<br>LA/SST/SUCNR1<br>AKT1/BAD/BAK1/BAX/CASP9/CC<br>ND1/CDKN1A/CTNNB1/EGF/EGFR<br>/ERBB2/GSK3B/MAPK1/MAPK3/M<br>YC/PTEN/RAF1/TP53<br>AKT1/CASP3/CDC42/EGF/EGFR/E<br>RBB2/FGF2/FGF7/FOS/HSPB1/IGF1<br>R/IKBKB/IL1A/IL1B/INS/INSR/IRA<br>K4/JUN/MAP3K7/MAPK1/MAPK14/<br>MAPK3/MAPK8/MAPK9/MYC/MY<br>D88/NFKB1/NTRK1/PPM1A/PRKC<br>A/PRKCB/RAC1/RAF1/RASGRP1/R | 39 |
| hsa<br>051<br>32 | Salmonella<br>infection      | 39/384 | 249/8115 | 2.28697<br>E-11 | 9.05761E<br>-11 | 3.48431E<br>-11 |                                                                                                                                                                                                                                                                                                                                                                                                                                                                                                                                                                                                                                                                                                                                                                                                                                                                                                                                                                                                                                                                                                                                                                                                                                                     | 39 |
| hsa<br>051<br>46 | Amoebiasis                   | 24/384 | 102/8115 | 3.56625<br>E-11 | 1.39408E<br>-10 | 5.36278E<br>-11 |                                                                                                                                                                                                                                                                                                                                                                                                                                                                                                                                                                                                                                                                                                                                                                                                                                                                                                                                                                                                                                                                                                                                                                                                                                                     | 24 |
| hsa<br>040<br>24 | cAMP<br>signaling<br>pathway | 36/384 | 221/8115 | 4.4695E<br>-11  | 1.72477E<br>-10 | 6.63488E<br>-11 |                                                                                                                                                                                                                                                                                                                                                                                                                                                                                                                                                                                                                                                                                                                                                                                                                                                                                                                                                                                                                                                                                                                                                                                                                                                     | 36 |
| hsa<br>052<br>13 | Endometrial<br>cancer        | 18/384 | 58/8115  | 7.52201<br>E-11 | 2.86598E<br>-10 | 1.10249E<br>-10 |                                                                                                                                                                                                                                                                                                                                                                                                                                                                                                                                                                                                                                                                                                                                                                                                                                                                                                                                                                                                                                                                                                                                                                                                                                                     | 18 |
| hsa<br>040<br>10 | MAPK<br>signaling<br>pathway | 42/384 | 294/8115 | 7.81907<br>E-11 | 2.94193E<br>-10 | 1.13171E<br>-10 |                                                                                                                                                                                                                                                                                                                                                                                                                                                                                                                                                                                                                                                                                                                                                                                                                                                                                                                                                                                                                                                                                                                                                                                                                                                     | 42 |

ELA/TGFA/TGFB1/TGFB2/TNF/TP5  
3/TRAF2/VEGFA

|                  |                                                                        |        |          |                 |                 |                 |                                                                                                                                                                                                                                                                                                                                                                                                                                                                                                                                           |    |
|------------------|------------------------------------------------------------------------|--------|----------|-----------------|-----------------|-----------------|-------------------------------------------------------------------------------------------------------------------------------------------------------------------------------------------------------------------------------------------------------------------------------------------------------------------------------------------------------------------------------------------------------------------------------------------------------------------------------------------------------------------------------------------|----|
| hsa<br>042<br>11 | Longevity<br>regulating<br>pathway                                     | 22/384 | 89/8115  | 8.4827E<br>-11  | 3.15221E<br>-10 | 1.2126E-<br>10  | ADIPOR1/ADIPOR2/AKT1/BAX/CA<br>T/CREB1/FOXO1/IGF1R/INS/INSR/I<br>RS1/MTOR/NFKB1/PPARG/PPARG<br>C1A/PRKAA1/PRKAA2/PRKAG2/R<br>ELA/SIRT1/SOD2/TP53<br>BCL2/BCL2L1/CASP1/CASP8/CCL2<br>/CXCL1/CXCL2/CXCL3/CXCL8/FA<br>DD/IKBKB/IL1B/IL6/IRAK4/JUN/M<br>AP3K7/MAPK1/MAPK14/MAPK3/<br>MAPK8/MAPK9/MYD88/NFKB1/N<br>FKBIA/PRKCD/RELA/STAT1/TLR4<br>/TNF/TRAF2/TRPV2/XIAP<br>AKT1/CREB1/FOS/FYN/IFNG/IKB<br>KB/IL1A/IL1B/JUN/MAP3K7/MAP<br>K1/MAPK14/MAPK3/MAPK8/MAP<br>K9/NCF1/NFKB1/NFKBIA/PPARG/<br>RAC1/RELA/STAT1/TGFB1/TGFB2<br>/TNF/TRAF2 | 22 |
| hsa<br>046<br>21 | NOD-like<br>receptor<br>signaling<br>pathway                           | 32/384 | 184/8115 | 9.92579<br>E-11 | 3.64349E<br>-10 | 1.40159E<br>-10 | CASP3/CDC42/CXCL1/CXCL2/CXC<br>L3/CXCL8/CXCR1/CXCR2/EGFR/I<br>KBKB/JUN/MAPK14/MAPK8/MAP<br>K9/NFKB1/NFKBIA/RAC1/RELA/S<br>RC                                                                                                                                                                                                                                                                                                                                                                                                              | 32 |
| hsa<br>043<br>80 | Osteoclast<br>differentiation                                          | 26/384 | 128/8115 | 1.80221<br>E-10 | 6.53572E<br>-10 | 2.51418E<br>-10 | CD28/CD80/CD86/HLA-A/HLA-B/H<br>LA-C/HLA-G/IFNG/IL12A/IL12B/IL<br>1A/IL1B/IL2/INS/TNF                                                                                                                                                                                                                                                                                                                                                                                                                                                     | 26 |
| hsa<br>051<br>20 | Epithelial cell<br>signaling in<br>Helicobacter<br>pylori<br>infection | 19/384 | 70/8115  | 2.96199<br>E-10 | 1.06138E<br>-09 | 4.08294E<br>-10 | ICAM1/IFNG/IL10/IL12A/IL12B/IL1<br>B/IL6/MYD88/NPPA/PRKCA/PRKC<br>B/SELE/TNF/VCAM1                                                                                                                                                                                                                                                                                                                                                                                                                                                        | 19 |
| hsa<br>049<br>40 | Type I<br>diabetes<br>mellitus                                         | 15/384 | 43/8115  | 4.5838E<br>-10  | 1.6232E-<br>09  | 6.24418E<br>-10 | ADORA2B/ADRA2A/ADRA2C/AD<br>RB1/ADRB2/ADRB3/AGT/C3/C3AR<br>1/C5/C5AR1/CALCA/CHRM1/CHR<br>M2/CHRNA7/DRD2/EDN1/F2/FPR1/<br>GAL/GCG/GH1/GHRL/GRM8/HCR<br>T/LHCGR/MTNR1A/MTNR1B/NPB/<br>NPY/OPRM1/OXT/P2RY1/P2RY4/P<br>DYN/POMC/PRSS1/PTGER3/PYY/S<br>1PR1/S1PR2/S1PR3/SST/THRB/TRP                                                                                                                                                                                                                                                           | 15 |
| hsa<br>051<br>43 | African<br>trypanosomias<br>is                                         | 14/384 | 37/8115  | 5.04029<br>E-10 | 1.7641E-<br>09  | 6.7862E-<br>10  |                                                                                                                                                                                                                                                                                                                                                                                                                                                                                                                                           | 14 |
| hsa<br>040<br>80 | Neuroactive<br>ligand-recepto<br>r interaction                         | 45/384 | 353/8115 | 7.32901<br>E-10 | 2.53567E<br>-09 | 9.75428E<br>-10 |                                                                                                                                                                                                                                                                                                                                                                                                                                                                                                                                           | 45 |

|                  |                                                            |        |          |                 |                 |                 |                                                                                                                                                                                                                   |    |
|------------------|------------------------------------------------------------|--------|----------|-----------------|-----------------|-----------------|-------------------------------------------------------------------------------------------------------------------------------------------------------------------------------------------------------------------|----|
| hsa<br>043<br>70 | VEGF<br>signaling<br>pathway                               | 17/384 | 59/8115  | 9.39319<br>E-10 | 3.2129E-<br>09  | 1.23595E<br>-09 | AKT1/BAD/CASP9/CDC42/HSPB1/<br>MAPK1/MAPK14/MAPK3/NOS3/PR<br>KCA/PRKCB/PTGS2/RAC1/RAF1/S<br>PHK1/SRC/VEGFA                                                                                                        | 17 |
| hsa<br>049<br>15 | Estrogen<br>signaling<br>pathway                           | 26/384 | 138/8115 | 1.01624<br>E-09 | 3.43693E<br>-09 | 1.32213E<br>-09 | AKT1/BCL2/CALM3/CREB1/CTSD/<br>EGFR/ESR1/ESR2/FOS/GNAI1/GNA<br>I2/GPER1/JUN/MAPK1/MAPK3/M<br>MP2/MMP9/NCOA1/NOS3/OPRM1/<br>PGR/POMC/PRKCD/RAF1/SRC/TG<br>FA                                                       | 26 |
| hsa<br>047<br>22 | Neurotrophin<br>signaling<br>pathway                       | 24/384 | 119/8115 | 1.0768E<br>-09  | 3.60129E<br>-09 | 1.38535E<br>-09 | AKT1/BAD/BAX/BCL2/CALM3/CD<br>C42/GSK3B/IKBKB/IRAK4/IRS1/JU<br>N/MAPK1/MAPK14/MAPK3/MAPK<br>8/MAPK9/NFKB1/NFKBIA/NTRK1/<br>PRKCD/RAC1/RAF1/RELA/TP53<br>ACACA/ADIPOR1/ADIPOR2/AKT1/<br>CCNA2/CCND1/CREB1/FASN/FOX | 24 |
| hsa<br>041<br>52 | AMPK<br>signaling<br>pathway                               | 24/384 | 120/8115 | 1.28832<br>E-09 | 4.26138E<br>-09 | 1.63928E<br>-09 | O1/HMGCR/IGF1R/INS/INSR/IRS1/<br>MAP3K7/MTOR/PPARG/PPARGC1<br>A/PRKAA1/PRKAA2/PRKAG2/SIR<br>T1/SLC2A4/SREBF1                                                                                                      | 24 |
| hsa<br>040<br>12 | ErbB<br>signaling<br>pathway                               | 19/384 | 85/8115  | 1.02982<br>E-08 | 3.36932E<br>-08 | 1.29612E<br>-08 | AKT1/BAD/CDKN1A/EGF/EGFR/E<br>RBB2/GSK3B/JUN/MAPK1/MAPK3<br>/MAPK8/MAPK9/MTOR/MYC/PRK<br>CA/PRKCB/RAF1/SRC/TGFA<br>ACACA/AKT1/BAD/CALM3/FASN/<br>FOXO1/GSK3B/IKBKB/INPPL1/INS                                     | 19 |
| hsa<br>049<br>10 | Insulin<br>signaling<br>pathway                            | 24/384 | 137/8115 | 2.03788<br>E-08 | 6.59572E<br>-08 | 2.53726E<br>-08 | /INSR/IRS1/MAPK1/MAPK3/MAPK<br>8/MAPK9/MTOR/PPARGC1A/PRK<br>AA1/PRKAA2/PRKAG2/RAF1/SLC2<br>A4/SREBF1                                                                                                              | 24 |
| hsa<br>049<br>35 | Growth<br>hormone<br>synthesis,<br>secretion and<br>action | 22/384 | 119/8115 | 2.91926<br>E-08 | 9.34784E<br>-08 | 3.59595E<br>-08 | AKT1/CREB1/FOS/GH1/GHRL/GN<br>AI1/GNAI2/GSK3B/IGFBP3/IRS1/M<br>APK1/MAPK14/MAPK3/MAPK8/M<br>APK9/MTOR/PRKCA/PRKCB/RAF1<br>/SST/STAT1/STAT3                                                                        | 22 |

|                  |                                               |        |          |                 |                 |                 |                                                                                                                                                                                                                                                          |    |
|------------------|-----------------------------------------------|--------|----------|-----------------|-----------------|-----------------|----------------------------------------------------------------------------------------------------------------------------------------------------------------------------------------------------------------------------------------------------------|----|
| hsa<br>053<br>32 | Graft-versus-h<br>ost disease                 | 13/384 | 42/8115  | 3.55744<br>E-08 | 1.12715E<br>-07 | 4.33594E<br>-08 | CD28/CD80/CD86/HLA-A/HLA-B/H<br>LA-C/HLA-G/IFNG/IL1A/IL1B/IL2/I<br>L6/TNF                                                                                                                                                                                | 13 |
| hsa<br>046<br>58 | Th1 and Th2<br>cell<br>differentiation        | 19/384 | 92/8115  | 4.07692<br>E-08 | 1.27828E<br>-07 | 4.91734E<br>-08 | FOS/IFNG/IKBKB/IL12A/IL12B/IL1<br>3/IL2/IL2RA/IL4/JUN/MAPK1/MAP<br>K14/MAPK3/MAPK8/MAPK9/NFK<br>B1/NFKBIA/RELA/STAT1                                                                                                                                     | 19 |
| hsa<br>040<br>15 | Rap1<br>signaling<br>pathway                  | 30/384 | 210/8115 | 4.60214<br>E-08 | 1.42809E<br>-07 | 5.4936E-<br>08  | ACTB/ACTG1/ADORA2B/AKT1/C<br>ALM3/CDC42/CTNNB1/DRD2/EGF/<br>EGFR/FGF2/FGF7/FPR1/GNAI1/GN<br>AI2/IGF1R/INS/INSR/ITGB1/MAPK<br>1/MAPK14/MAPK3/P2RY1/PRKCA/<br>PRKCB/PRKD1/RAC1/RAF1/SRC/V<br>EGFA                                                          | 30 |
| hsa<br>052<br>06 | MicroRNAs<br>in cancer                        | 38/384 | 310/8115 | 4.97902<br>E-08 | 1.52927E<br>-07 | 5.88284E<br>-08 | ABCB1/BAK1/BCL2/BCL2L11/BRC<br>A1/CASP3/CCND1/CCND2/CCNE1/<br>CDK6/CDKN1A/CDKN2A/CYP1B1/<br>E2F1/EGFR/ERBB2/HMOX1/IKBKB<br>/IRS1/MAPK1/MAPK3/MCL1/MDM<br>2/MMP9/MTOR/MYC/NFKB1/PLA<br>U/PRKCA/PRKCB/PTEN/PTGS2/RA<br>F1/SIRT1/STAT3/TGFB2/TP53/VEG<br>FA | 38 |
| hsa<br>052<br>21 | Acute myeloid<br>leukemia                     | 16/384 | 67/8115  | 5.66833<br>E-08 | 1.7234E-<br>07  | 6.62963E<br>-08 | AKT1/BAD/BCL2A1/CCNA2/CCND<br>1/IKBKB/MAPK1/MAPK3/MPO/MT<br>OR/MYC/NFKB1/PPARD/RAF1/RE<br>LA/STAT3                                                                                                                                                       | 16 |
| hsa<br>046<br>13 | Neutrophil<br>extracellular<br>trap formation | 28/384 | 190/8115 | 6.68954<br>E-08 | 2.00187E<br>-07 | 7.70085E<br>-08 | ACTB/ACTG1/AKT1/C3/C5/C5AR1/<br>CASP1/CLEC7A/FPR1/HMGB1/MA<br>P3K7/MAPK1/MAPK14/MAPK3/MP<br>O/MTOR/NCF1/NFKB1/PPIF/PRKC<br>A/PRKCB/RAC1/RAF1/RELA/SELP/<br>SRC/TLR4/VWF                                                                                  | 28 |
| hsa<br>052<br>16 | Thyroid<br>cancer                             | 12/384 | 37/8115  | 6.71724<br>E-08 | 2.00187E<br>-07 | 7.70085E<br>-08 | BAK1/BAX/CCND1/CDKN1A/CTN<br>NB1/MAPK1/MAPK3/MYC/NTRK1/<br>PPARG/RXRA/TP53                                                                                                                                                                               | 12 |
| hsa<br>041<br>10 | Cell cycle                                    | 22/384 | 126/8115 | 8.53933<br>E-08 | 2.51994E<br>-07 | 9.69377E<br>-08 | CCNA2/CCNB1/CCND1/CCND2/CC<br>NE1/CDK2/CDK4/CDK6/CDK7/CD<br>KN1A/CDKN2A/CHEK2/E2F1/GSK<br>3B/MDM2/MYC/RB1/SMAD2/MA<br>D3/TGFB1/TGFB2/TP53                                                                                                                | 22 |

|          |                                                   |        |          |             |             |             |                                                                                                                                                                                                                                                                                |    |
|----------|---------------------------------------------------|--------|----------|-------------|-------------|-------------|--------------------------------------------------------------------------------------------------------------------------------------------------------------------------------------------------------------------------------------------------------------------------------|----|
| hsa05010 | Alzheimer disease                                 | 43/384 | 384/8115 | 8.96936E-08 | 2.62114E-07 | 1.00831E-07 | AKT1/APP/ATP5F1B/BAD/CALM3/CASP3/CASP7/CASP8/CASP9/CHRM1/CHRNA7/CTNNB1/CYCS/EIF2S1/FADD/GSK3B/IKBKB/IL1A/IL1B/IL6/INS/INSR/IRS1/LPL/MAPK1/MAPK3/MAPK8/MAPK9/MME/MTOR/NFKB1/NOS1/NOS2/NOX4/PPIF/PTGS2/RAF1/RELA/SDHA/SDHB/TNF/TRAF2/WNT4                                        | 43 |
| hsa04622 | RIG-I-like receptor signaling pathway             | 16/384 | 70/8115  | 1.09768E-07 | 3.17695E-07 | 1.22212E-07 | CASP8/CXCL10/CXCL8/FADD/IKBKB/IL12A/IL12B/MAP3K7/MAPK14/MAPK8/MAPK9/NFKB1/NFKBIA/RELA/TNF/TRAF2                                                                                                                                                                                | 16 |
| hsa04930 | Type II diabetes mellitus                         | 13/384 | 46/8115  | 1.1932E-07  | 3.42051E-07 | 1.31581E-07 | IKBKB/INS/INSR/IRS1/MAPK1/MAPK3/MAPK8/MAPK9/MTOR/PRKCD/SLC2A2/SLC2A4/TNF                                                                                                                                                                                                       | 13 |
| hsa04371 | Apelin signaling pathway                          | 23/384 | 139/8115 | 1.20966E-07 | 3.43497E-07 | 1.32137E-07 | ACTA2/AKT1/CALM3/CCND1/GNAI1/GNAI2/MAPK1/MAPK3/MTOR/MYLK/NOS1/NOS2/NOS3/PPARGC1A/PRKAA1/PRKAA2/PRKAG2/RAF1/SERPINE1/SMAD2/SMAD3/SPK1/SPP1                                                                                                                                      | 23 |
| hsa04630 | JAK-STAT signaling pathway                        | 25/384 | 162/8115 | 1.38865E-07 | 3.9064E-07  | 1.50272E-07 | AKT1/BCL2/BCL2L1/CCND1/CCND2/CDKN1A/EGF/EGFR/EPO/GH1/IFNG/IL10/IL12A/IL12B/IL13/IL2/IL2RA/IL4/IL6/MCL1/MTOR/MYC/RAF1/STAT1/STAT3                                                                                                                                               | 25 |
| hsa05022 | Pathways of neurodegeneration - multiple diseases | 49/384 | 476/8115 | 1.52277E-07 | 4.24402E-07 | 1.6326E-07  | APP/ATP5F1B/BAD/BAK1/BAX/BCL2/BCL2L1/CALM3/CASP3/CASP7/CASP8/CASP9/CAT/CHRM1/CHRNA7/CTNNB1/CYCS/EIF2S1/FADD/GSK3B/HSPA5/IL1A/IL1B/IL6/MAPK1/MAPK14/MAPK3/MAPK8/MAPK9/MTOR/NFKB1/NOS1/NOS2/NOX4/PDYN/PPIF/PRKCA/PRKCB/PTGS2/RAC1/RAF1/RELA/SDHA/SDHB/SLC6A3/SOD1/TNF/TRAF2/WNT4 | 49 |
| hsa04140 | Autophagy - animal                                | 23/384 | 141/8115 | 1.58452E-07 | 4.3756E-07  | 1.68322E-07 | AKT1/BAD/BCL2/BCL2L1/CFLAR/CTSD/EIF2S1/HIF1A/HMGB1/IGF1R/INS/IRS1/MAP3K7/MAPK1/MAPK3/MAPK8/MAPK9/MTOR/PRKAA1/PRKAA2/PRKCD/PTEN/RAF1                                                                                                                                            | 23 |

|                  |                                                             |        |          |                 |                 |                 |                                                                                                                                                                    |    |
|------------------|-------------------------------------------------------------|--------|----------|-----------------|-----------------|-----------------|--------------------------------------------------------------------------------------------------------------------------------------------------------------------|----|
| hsa<br>049<br>21 | Oxytocin<br>signaling<br>pathway                            | 24/384 | 154/8115 | 2.05796<br>E-07 | 5.63131E<br>-07 | 2.16627E<br>-07 | ACTB/ACTG1/CALM3/CCND1/CD<br>KN1A/EGFR/FOS/GNAI1/GNAI2/JU<br>N/MAPK1/MAPK3/MYLK/NOS3/NP<br>PA/OXT/PRKAA1/PRKAA2/PRKAG<br>2/PRKCA/PRKCB/PTGS2/RAF1/SR<br>C          | 24 |
| hsa<br>049<br>23 | Regulation of<br>lipolysis in<br>adipocytes                 | 14/384 | 56/8115  | 2.09957<br>E-07 | 5.69343E<br>-07 | 2.19016E<br>-07 | ADRB1/ADRB2/ADRB3/AKT1/GN<br>AI1/GNAI2/INS/INSR/IRS1/NPPA/N<br>PY/PTGER3/PTGS1/PTGS2                                                                               | 14 |
| hsa<br>046<br>72 | Intestinal<br>immune<br>network for<br>IgA<br>production    | 13/384 | 49/8115  | 2.7043E<br>-07  | 7.2035E-<br>07  | 2.77106E<br>-07 | CCL25/CCL28/CD28/CD40/CD40LG<br>/CD80/CD86/CXCL12/IL10/IL2/IL4/I<br>L6/TGFB1                                                                                       | 13 |
| hsa<br>050<br>30 | Cocaine<br>addiction                                        | 13/384 | 49/8115  | 2.7043E<br>-07  | 7.2035E-<br>07  | 2.77106E<br>-07 | CREB1/DDC/DRD2/GNAI1/GNAI2/J<br>UN/MAOA/MAOB/NFKB1/PDYN/R<br>ELA/SLC6A3/TH                                                                                         | 13 |
| hsa<br>046<br>11 | Platelet<br>activation                                      | 21/384 | 124/8115 | 2.88907<br>E-07 | 7.62817E<br>-07 | 2.93442E<br>-07 | ACTB/ACTG1/AKT1/COL1A1/COL<br>3A1/F2/FYN/GNAI1/GNAI2/ITGB1/<br>MAPK1/MAPK14/MAPK3/MYLK/N<br>OS3/P2RY1/P2RY12/PTGS1/RASGR<br>P1/SRC/VWF                             | 21 |
| hsa<br>042<br>13 | Longevity<br>regulating<br>pathway -<br>multiple<br>species | 14/384 | 62/8115  | 8.10913<br>E-07 | 2.12248E<br>-06 | 8.16479E<br>-07 | AKT1/CAT/FOXO1/IGF1R/INS/INS<br>R/IRS1/MTOR/PRKAA1/PRKAA2/P<br>RKAG2/SIRT1/SOD1/SOD2                                                                               | 14 |
| hsa<br>045<br>20 | Adherens<br>junction                                        | 15/384 | 71/8115  | 8.18565<br>E-07 | 2.12403E<br>-06 | 8.17079E<br>-07 | ACTB/ACTG1/CDC42/CTNNB1/EG<br>FR/ERBB2/FYN/IGF1R/INSR/MAP3<br>K7/MAPK1/MAPK3/RAC1/SMAD3/<br>SRC                                                                    | 15 |
| hsa<br>052<br>02 | Transcriptiona<br>l<br>misregulation<br>in cancer           | 26/384 | 193/8115 | 1.18816<br>E-06 | 3.05671E<br>-06 | 1.17586E<br>-06 | BAK1/BAX/BCL2A1/BCL2L1/CCN<br>A2/CCND2/CD40/CD86/CDKN1A/C<br>XCL8/FOXO1/IGF1R/IGFBP3/IL6/M<br>DM2/MMP9/MPO/MYC/NFKB1/NT<br>RK1/PLAU/PPARG/RELA/RUNX2/<br>RXRA/TP53 | 26 |
| hsa<br>046<br>64 | Fc epsilon RI<br>signaling<br>pathway                       | 14/384 | 68/8115  | 2.65016<br>E-06 | 6.76015E<br>-06 | 2.60051E<br>-06 | AKT1/ALOX5/FYN/IL13/IL4/MAPK<br>1/MAPK14/MAPK3/MAPK8/MAPK<br>9/PRKCA/RAC1/RAF1/TNF                                                                                 | 14 |
| hsa<br>052<br>31 | Choline<br>metabolism in<br>cancer                          | 17/384 | 98/8115  | 2.82334<br>E-06 | 7.14138E<br>-06 | 2.74717E<br>-06 | AKT1/EGF/EGFR/FOS/HIF1A/JUN/<br>MAPK1/MAPK3/MAPK8/MAPK9/M<br>TOR/PCYT1A/PRKCA/PRKCB/RAC<br>1/RAF1/SLC5A7                                                           | 17 |

|                  |                                                     |        |          |                 |                 |                 |                                                                                                                                                                           |    |
|------------------|-----------------------------------------------------|--------|----------|-----------------|-----------------|-----------------|---------------------------------------------------------------------------------------------------------------------------------------------------------------------------|----|
| hsa<br>052<br>11 | Renal cell<br>carcinoma                             | 14/384 | 69/8115  | 3.1839E<br>-06  | 7.98629E<br>-06 | 3.07219E<br>-06 | AKT1/BAD/CDC42/CDKN1A/HIF1<br>A/JUN/MAPK1/MAPK3/RAC1/RAF<br>1/TGFA/TGFB1/TGFB2/VEGFA                                                                                      | 14 |
| hsa<br>052<br>30 | Central carbon<br>metabolism in<br>cancer           | 14/384 | 70/8115  | 3.8113E<br>-06  | 9.48101E<br>-06 | 3.64718E<br>-06 | AKT1/EGFR/ERBB2/G6PD/HIF1A/<br>MAPK1/MAPK3/MTOR/MYC/NTR<br>K1/PTEN/RAF1/SLC2A2/TP53                                                                                       | 14 |
| hsa<br>053<br>20 | Autoimmune<br>thyroid<br>disease                    | 12/384 | 53/8115  | 4.85812<br>E-06 | 1.1986E-<br>05  | 4.61081E<br>-06 | CD28/CD40/CD40LG/CD80/CD86/H<br>LA-A/HLA-B/HLA-C/HLA-G/IL10/I<br>L2/IL4                                                                                                   | 12 |
| hsa<br>049<br>60 | Aldosterone-r<br>egulated<br>sodium<br>reabsorption | 10/384 | 37/8115  | 5.53121<br>E-06 | 1.34319E<br>-05 | 5.16703E<br>-06 | INS/INSR/IRS1/MAPK1/MAPK3/PR<br>KCA/PRKCB/SCNN1A/SCNN1B/SC<br>NN1G                                                                                                        | 10 |
| hsa<br>046<br>62 | B cell receptor<br>signaling<br>pathway             | 15/384 | 82/8115  | 5.53342<br>E-06 | 1.34319E<br>-05 | 5.16703E<br>-06 | AKT1/CD79A/FOS/GSK3B/IKBKB/I<br>NPPL1/JUN/MAPK1/MAPK3/NFKB<br>1/NFKBIA/PRKCB/RAC1/RAF1/RE<br>LA                                                                           | 15 |
| hsa<br>046<br>70 | Leukocyte<br>transendotheli<br>al migration         | 18/384 | 114/8115 | 5.80309<br>E-06 | 1.39739E<br>-05 | 5.3755E-<br>06  | ACTB/ACTG1/CDC42/CTNNB1/CX<br>CL12/GNAI1/GNAI2/ICAM1/ITGB1/<br>MAPK14/MMP2/MMP9/NCF1/PEC<br>AM1/PRKCA/PRKCB/RAC1/VCAM<br>1                                                | 18 |
| hsa<br>040<br>22 | cGMP-PKG<br>signaling<br>pathway                    | 22/384 | 167/8115 | 1.15109<br>E-05 | 2.74982E<br>-05 | 1.05781E<br>-05 | ADRA2A/ADRA2C/ADRB1/ADRB2<br>/ADRB3/AKT1/BAD/CALM3/CREB<br>1/GNAI1/GNAI2/INS/INSR/IRS1/M<br>APK1/MAPK3/MYLK/NOS3/NPPA/<br>PDE5A/PPIF/RAF1                                 | 22 |
| hsa<br>049<br>34 | Cushing<br>syndrome                                 | 21/384 | 155/8115 | 1.17625<br>E-05 | 2.78781E<br>-05 | 1.07242E<br>-05 | AGT/AHR/CCND1/CCNE1/CDK2/C<br>DK4/CDK6/CDKN1A/CDKN2A/CR<br>EB1/CTNNB1/E2F1/EGFR/GNAI1/G<br>NAI2/GSK3B/MAPK1/MAPK3/POM<br>C/RB1/WNT4                                       | 21 |
| hsa<br>040<br>14 | Ras signaling<br>pathway                            | 27/384 | 232/8115 | 1.24392<br>E-05 | 2.92515E<br>-05 | 1.12525E<br>-05 | AKT1/BAD/BCL2L1/CALM3/CDC4<br>2/EGF/EGFR/FGF2/FGF7/IGF1R/IK<br>BKB/INS/INSR/MAPK1/MAPK3/M<br>APK8/MAPK9/NFKB1/NTRK1/PRK<br>CA/PRKCB/RAC1/RAF1/RASGRP1/<br>RELA/TGFA/VEGFA | 27 |
| hsa<br>047<br>28 | Dopaminergic<br>synapse                             | 19/384 | 132/8115 | 1.27948<br>E-05 | 2.98545E<br>-05 | 1.14845E<br>-05 | AKT1/CALM3/CREB1/DDC/DRD2/<br>FOS/GNAI1/GNAI2/GSK3A/GSK3B/<br>MAOA/MAOB/MAPK14/MAPK8/M<br>APK9/PRKCA/PRKCB/SLC6A3/TH                                                      | 19 |
| hsa<br>050       | Amphetamine<br>addiction                            | 13/384 | 69/8115  | 1.67906<br>E-05 | 3.88767E<br>-05 | 1.49552E<br>-05 | CALM3/CREB1/DDC/FOS/JUN/MA<br>OA/MAOB/PDYN/PRKCA/PRKCB/                                                                                                                   | 13 |



|                  |                                                   |        |          |                 |                 |                 | SIRT1/SLC6A3/TH                                                                                                                                                                |    |
|------------------|---------------------------------------------------|--------|----------|-----------------|-----------------|-----------------|--------------------------------------------------------------------------------------------------------------------------------------------------------------------------------|----|
| hsa<br>047<br>26 | Serotonergic<br>synapse                           | 17/384 | 115/8115 | 2.57079<br>E-05 | 5.90694E<br>-05 | 2.2723E-<br>05  | ALOX5/APP/CASP3/DDC/GNAI1/G<br>NAI2/HTR3A/MAOA/MAOB/MAPK<br>1/MAPK3/PRKCA/PRKCB/PTGS1/P<br>TGS2/RAF1/SLC6A4                                                                    | 17 |
| hsa<br>049<br>12 | GnRH<br>signaling<br>pathway                      | 15/384 | 93/8115  | 2.6923E<br>-05  | 6.13926E<br>-05 | 2.36167E<br>-05 | CALM3/CDC42/EGFR/JUN/MAPK1/<br>MAPK14/MAPK3/MAPK8/MAPK9/<br>MMP2/PRKCA/PRKCB/PRKCD/RA<br>F1/SRC                                                                                | 15 |
| hsa<br>050<br>20 | Prion disease                                     | 29/384 | 273/8115 | 3.41166<br>E-05 | 7.72113E<br>-05 | 2.97018E<br>-05 | ATP5F1B/BAD/BAX/C5/CASP3/CA<br>SP9/CAV1/CREB1/CYCS/EIF2S1/F<br>YN/GSK3B/HSPA5/IL1A/IL1B/IL6/<br>MAPK1/MAPK14/MAPK3/MAPK8/<br>MAPK9/NCF1/PPIF/PRKCD/RAC1/<br>SDHA/SDHB/SOD1/TNF | 29 |
| hsa<br>046<br>10 | Complement<br>and<br>coagulation<br>cascades      | 14/384 | 85/8115  | 3.91844<br>E-05 | 8.80187E<br>-05 | 3.38593E<br>-05 | C3/C3AR1/C4BPB/C5/C5AR1/F2/F3/<br>PLAU/SERPINA1/SERPINA5/SERPI<br>NC1/SERPINE1/THBD/VWF                                                                                        | 14 |
| hsa<br>042<br>17 | Necroptosis                                       | 20/384 | 159/8115 | 5.64767<br>E-05 | 0.000125<br>922 | 4.84401E<br>-05 | BAX/BCL2/CASP1/CASP8/CFLAR/<br>FADD/HMGB1/IFNG/IL1A/IL1B/M<br>APK8/MAPK9/PARP1/STAT1/STAT<br>3/TLR4/TNF/TNFRSF10A/TRAF2/X<br>IAP                                               | 20 |
| hsa<br>040<br>72 | Phospholipase<br>D signaling<br>pathway           | 19/384 | 148/8115 | 6.53008<br>E-05 | 0.000144<br>526 | 5.55967E<br>-05 | AGT/AKT1/ARF1/CXCL8/CXCR1/C<br>XCR2/EGF/EGFR/F2/FYN/GRM8/IN<br>S/INSR/MAPK1/MAPK3/MTOR/PR<br>KCA/RAF1/SPHK1                                                                    | 19 |
| hsa<br>054<br>10 | Hypertrophic<br>cardiomyopat<br>hy                | 14/384 | 90/8115  | 7.51272<br>E-05 | 0.000165<br>061 | 6.34959E<br>-05 | ACE/ACTB/ACTC1/ACTG1/AGT/E<br>DN1/IL6/ITGB1/PRKAA1/PRKAA2/<br>PRKAG2/TGFB1/TGFB2/TNF                                                                                           | 14 |
| hsa<br>047<br>25 | Cholinergic<br>synapse                            | 16/384 | 113/8115 | 7.57124<br>E-05 | 0.000165<br>141 | 6.35268E<br>-05 | ACHE/AKT1/BCL2/CHRM1/CHRM<br>2/CHRNA7/CREB1/FOS/FYN/GNAI<br>1/GNAI2/MAPK1/MAPK3/PRKCA/P<br>RKCB/SLC5A7                                                                         | 16 |
| hsa<br>049<br>24 | Renin<br>secretion                                | 12/384 | 69/8115  | 8.08166<br>E-05 | 0.000175<br>006 | 6.73217E<br>-05 | ACE/ADRB1/ADRB2/ADRB3/AGT/<br>CALM3/CREB1/EDN1/GNAI1/GNA<br>I2/NPPA/REN                                                                                                        | 12 |
| hsa<br>049<br>14 | Progesterone-<br>mediated<br>oocyte<br>maturation | 15/384 | 102/8115 | 8.14445<br>E-05 | 0.000175<br>106 | 6.73601E<br>-05 | AKT1/CCNA2/CCNB1/CDK2/GNAI<br>1/GNAI2/IGF1R/INS/MAPK1/MAPK<br>14/MAPK3/MAPK8/MAPK9/PGR/R<br>AF1                                                                                | 15 |

|                  |                                                                 |        |          |                 |                 |                 |                                                                                                                                                 |    |
|------------------|-----------------------------------------------------------------|--------|----------|-----------------|-----------------|-----------------|-------------------------------------------------------------------------------------------------------------------------------------------------|----|
| hsa<br>049<br>13 | Ovarian<br>steroidogenesis                                      | 10/384 | 51/8115  | 0.00011<br>2036 | 0.000239<br>168 | 9.20038E<br>-05 | ALOX5/BMP6/CYP19A1/CYP1A1/CYP1B1/IGF1R/INS/INSR/LHCGR/PTGS2                                                                                     | 10 |
| hsa<br>049<br>28 | Parathyroid<br>hormone<br>synthesis,<br>secretion and<br>action | 15/384 | 106/8115 | 0.00012<br>7345 | 0.000269<br>936 | 0.000103<br>84  | BCL2/BGLAP/CDKN1A/CREB1/EGFR/FOS/GNAI1/GNAI2/MAPK1/MAPK3/PRKCA/PRKCB/RAF1/RUNX2/RXRA                                                            | 15 |
| hsa<br>046<br>50 | Natural killer<br>cell mediated<br>cytotoxicity                 | 17/384 | 131/8115 | 0.00013<br>7709 | 0.000289<br>863 | 0.000111<br>505 | CASP3/FYN/HLA-A/HLA-B/HLA-C/HLA-G/ICAM1/IFNG/KLRK1/MAPK1/MAPK3/PRKCA/PRKCB/RAC1/RAF1/TNF/TNFRSF10A                                              | 17 |
| hsa<br>040<br>20 | Calcium<br>signaling<br>pathway                                 | 25/384 | 240/8115 | 0.00016<br>2925 | 0.000340<br>559 | 0.000131<br>007 | ADORA2B/ADRB1/ADRB2/ADRB3/CALM3/CHRM1/CHRM2/CHRNA7/EGF/EGFR/ERBB2/FGF2/FGF7/LHCGR/MYLK/NOS1/NOS2/NOS3/NTSR1/PPIF/PRKCA/PRKCB/PTGER3/SPHK1/VEGFA | 25 |
| hsa<br>045<br>40 | Gap junction                                                    | 13/384 | 88/8115  | 0.00023<br>0476 | 0.000478<br>436 | 0.000184<br>046 | ADRB1/DRD2/EGF/EGFR/GJA1/GNAI1/GNAI2/MAPK1/MAPK3/PRKCA/PRKCB/RAF1/SRC                                                                           | 13 |
| hsa<br>049<br>16 | Melanogenesis                                                   | 14/384 | 101/8115 | 0.00026<br>5465 | 0.000547<br>293 | 0.000210<br>534 | CALM3/CREB1/CTNNB1/EDN1/GNAI1/GNAI2/GSK3B/MAPK1/MAPK3/POMC/PRKCA/PRKCB/RAF1/WNT4                                                                | 14 |
| hsa<br>041<br>50 | mTOR<br>signaling<br>pathway                                    | 18/384 | 156/8115 | 0.00039<br>2971 | 0.000804<br>655 | 0.000309<br>537 | AKT1/GSK3B/IGF1R/IKBKB/INS/INSR/IRS1/MAPK1/MAPK3/MTOR/PRKAA1/PRKAA2/PRKCA/PRKCB/PDEN/RAF1/TNF/WNT4                                              | 18 |
| hsa<br>015<br>23 | Antifolate<br>resistance                                        | 7/384  | 30/8115  | 0.00039<br>7362 | 0.000808<br>148 | 0.000310<br>881 | ABCG2/IKBKB/IL1B/IL6/NFKB1/RELA/TNF                                                                                                             | 7  |
| hsa<br>043<br>50 | TGF-beta<br>signaling<br>pathway                                | 13/384 | 94/8115  | 0.00044<br>7114 | 0.000903<br>231 | 0.000347<br>457 | BMP2/BMP4/BMP6/FST/IFNG/MAPK1/MAPK3/MYC/SMAD2/SMAD3/TGFB1/TGFB2/TNF                                                                             | 13 |
| hsa<br>003<br>80 | Tryptophan<br>metabolism                                        | 8/384  | 42/8115  | 0.00066<br>8727 | 0.001339<br>845 | 0.000515<br>415 | ALDH2/CAT/CYP1A1/CYP1A2/CYP1B1/DDC/MAOA/MAOB                                                                                                    | 8  |
| hsa<br>047<br>50 | Inflammatory<br>mediator<br>regulation of<br>TRP channels       | 13/384 | 98/8115  | 0.00067<br>2148 | 0.001339<br>845 | 0.000515<br>415 | CALM3/IL1B/MAPK14/MAPK8/MAPK9/NTRK1/PRKCA/PRKCB/PRKCD/SRC/TRPV1/TRPV2/TRPV4                                                                     | 13 |
| hsa<br>049       | GnRH<br>secretion                                               | 10/384 | 64/8115  | 0.00076<br>7271 | 0.001519<br>399 | 0.000584<br>486 | AKT1/ESR2/GPER1/KCNN4/MAPK1/MAPK3/PRKCA/PRKCB/RAF1/SP                                                                                           | 10 |

|                  |                                             |        |          |                 |                 |                 |                                                                                                                                                                                         |    |
|------------------|---------------------------------------------|--------|----------|-----------------|-----------------|-----------------|-----------------------------------------------------------------------------------------------------------------------------------------------------------------------------------------|----|
| hsa<br>041<br>45 | Phagosome                                   | 17/384 | 152/8115 | 0.00081<br>1197 | 0.001595<br>884 | 0.000613<br>909 | ACTB/ACTG1/C3/CD209/CLEC7A/<br>HLA-A/HLA-B/HLA-C/HLA-G/ITG<br>B1/MARCO/MPO/NCF1/NOS1/OLR<br>1/RAC1/TLR4                                                                                 | 17 |
| hsa<br>043<br>90 | Hippo<br>signaling<br>pathway               | 17/384 | 157/8115 | 0.00116<br>8176 | 0.002283<br>253 | 0.000878<br>328 | ACTB/ACTG1/BIRC5/BMP2/BMP4/<br>BMP6/CCND1/CCND2/CTNNB1/GS<br>K3B/MYC/SERPINE1/SMAD2/SMA<br>D3/TGFB1/TGFB2/WNT4                                                                          | 17 |
| hsa<br>049<br>22 | Glucagon<br>signaling<br>pathway            | 13/384 | 107/8115 | 0.00154<br>2392 | 0.002995<br>226 | 0.001152<br>212 | ACACA/AKT1/CALM3/CREB1/FO<br>XO1/GCG/PPARA/PPARGC1A/PRK<br>AA1/PRKAA2/PRKAG2/SIRT1/SLC<br>2A2                                                                                           | 13 |
| hsa<br>042<br>70 | Vascular<br>smooth<br>muscle<br>contraction | 15/384 | 134/8115 | 0.00160<br>6674 | 0.003100<br>056 | 0.001192<br>538 | ACTA2/ACTG2/ADORA2B/AGT/C<br>ALCA/CALM3/EDN1/MAPK1/MAP<br>K3/MYLK/NPPA/PRKCA/PRKCB/P<br>RKCD/RAF1                                                                                       | 15 |
| hsa<br>050<br>12 | Parkinson<br>disease                        | 24/384 | 266/8115 | 0.00173<br>2111 | 0.003320<br>798 | 0.001277<br>453 | ATP5F1B/BAX/BCL2L1/CALM3/C<br>ASP3/CASP9/CYCS/DRD2/EIF2S1/<br>GNAI1/GNAI2/HSPA5/MAOA/MAO<br>B/MAPK8/MAPK9/NFE2L2/PPIF/SD<br>HA/SDHB/SLC6A3/SOD1/TH/TP53<br>CD28/CD40/CD40LG/CD80/CD86/H | 24 |
| hsa<br>045<br>14 | Cell adhesion<br>molecules                  | 16/384 | 149/8115 | 0.00176<br>3968 | 0.003360<br>472 | 0.001292<br>715 | LA-A/HLA-B/HLA-C/HLA-G/ICAM<br>1/ITGB1/PECAM1/SELE/SELL/SEL<br>P/VCAM1                                                                                                                  | 16 |
| hsa<br>047<br>30 | Long-term<br>depression                     | 9/384  | 60/8115  | 0.00187<br>6341 | 0.003552<br>068 | 0.001366<br>419 | GNAI1/GNAI2/IGF1R/MAPK1/MAP<br>K3/NOS1/PRKCA/PRKCB/RAF1                                                                                                                                 | 9  |
| hsa<br>046<br>66 | Fc gamma<br>R-mediated<br>phagocytosis      | 12/384 | 97/8115  | 0.00198<br>0966 | 0.003703<br>544 | 0.001424<br>689 | AKT1/CDC42/INPPL1/MAPK1/MAP<br>K3/NCF1/PRKCA/PRKCB/PRKCD/<br>RAC1/RAF1/SPHK1                                                                                                            | 12 |
| hsa<br>047<br>13 | Circadian<br>entrainment                    | 12/384 | 97/8115  | 0.00198<br>0966 | 0.003703<br>544 | 0.001424<br>689 | CALM3/CREB1/FOS/GNAI1/GNAI2<br>/MAPK1/MAPK3/MTNR1A/MTNR1<br>B/NOS1/PRKCA/PRKCB                                                                                                          | 12 |
| hsa<br>003<br>30 | Arginine and<br>proline<br>metabolism       | 8/384  | 51/8115  | 0.00248<br>8417 | 0.004623<br>54  | 0.001778<br>595 | ALDH2/GATM/MAOA/MAOB/NOS<br>1/NOS2/NOS3/ODC1                                                                                                                                            | 8  |
| hsa<br>046<br>23 | Cytosolic<br>DNA-sensing<br>pathway         | 9/384  | 63/8115  | 0.00265<br>166  | 0.004866<br>767 | 0.001872<br>161 | ADAR/CASP1/CXCL10/IKBKB/IL1<br>B/IL6/NFKB1/NFKBIA/RELA                                                                                                                                  | 9  |

|                  |                                                          |        |          |                 |                 |                 |                                                                                                                                                                                                                   |    |
|------------------|----------------------------------------------------------|--------|----------|-----------------|-----------------|-----------------|-------------------------------------------------------------------------------------------------------------------------------------------------------------------------------------------------------------------|----|
| hsa<br>052<br>17 | Basal cell carcinoma                                     | 9/384  | 63/8115  | 0.00265<br>166  | 0.004866<br>767 | 0.001872<br>161 | BAK1/BAX/BMP2/BMP4/CDKN1A/<br>CTNNB1/GSK3B/TP53/WNT4                                                                                                                                                              | 9  |
| hsa<br>053<br>10 | Asthma                                                   | 6/384  | 31/8115  | 0.00290<br>2464 | 0.005294<br>799 | 0.002036<br>817 | CD40/CD40LG/IL10/IL13/IL4/TNF                                                                                                                                                                                     | 6  |
| hsa<br>049<br>71 | Gastric acid secretion                                   | 10/384 | 76/8115  | 0.00292<br>1491 | 0.005297<br>402 | 0.002037<br>818 | ACTB/ACTG1/CA2/CALM3/GNAI1/<br>GNAI2/MYLK/PRKCA/PRKCB/SST                                                                                                                                                         | 10 |
| hsa<br>045<br>50 | Signaling pathways regulating pluripotency of stem cells | 15/384 | 143/8115 | 0.00305<br>2626 | 0.005502<br>038 | 0.002116<br>539 | AKT1/BMP4/CTNNB1/FGF2/GSK3<br>B/IGF1R/MAPK1/MAPK14/MAPK3/<br>MYC/RAF1/SMAD2/SMAD3/STAT3<br>/WNT4                                                                                                                  | 15 |
| hsa<br>048<br>10 | Regulation of actin cytoskeleton                         | 20/384 | 218/8115 | 0.00338<br>4565 | 0.006064<br>012 | 0.002332<br>72  | ACTB/ACTG1/CDC42/CHRM1/CHR<br>M2/CXCL12/EGF/EGFR/F2/FGF2/F<br>GF7/FN1/INS/ITGB1/MAPK1/MAP<br>K3/MYLK/RAC1/RAF1/SRC<br>AKT1/BAD/BAK1/BAX/BCL2/BCL<br>2L1/C3/C5/CASP3/CASP8/CASP9/C<br>CL2/CYCS/EIF2S1/FADD/HLA-A/H | 20 |
| hsa<br>051<br>68 | Herpes simplex virus 1 infection                         | 37/384 | 495/8115 | 0.00356<br>8042 | 0.006354<br>915 | 0.002444<br>625 | LA-B/HLA-C/HLA-G/IFNG/IKBKB/<br>IL12A/IL12B/IL1B/IL6/IRAK4/MAP<br>3K7/MTOR/MYD88/NFKB1/NFKBI<br>A/RELA/SRC/STAT1/TNF/TP53/TR<br>AF2                                                                               | 37 |
| hsa<br>042<br>61 | Adrenergic signaling in cardiomyocytes                   | 15/384 | 150/8115 | 0.00480<br>5271 | 0.008508<br>156 | 0.003272<br>94  | ACTC1/ADRB1/ADRB2/AGT/AKT1<br>/BCL2/CALM3/CREB1/GNAI1/GNA<br>I2/MAPK1/MAPK14/MAPK3/PRKC<br>A/SCN5A                                                                                                                | 15 |
| hsa<br>052<br>04 | Chemical carcinogenesis - DNA adducts                    | 9/384  | 69/8115  | 0.00495<br>0345 | 0.008713<br>765 | 0.003352<br>034 | CYP1A1/CYP1A2/CYP1B1/CYP3A4<br>/EPHX1/GSTM1/GSTM2/GSTP1/PT<br>GS2                                                                                                                                                 | 9  |
| hsa<br>043<br>10 | Wnt signaling pathway                                    | 16/384 | 167/8115 | 0.00553<br>6907 | 0.009689<br>587 | 0.003727<br>416 | CCND1/CCND2/CTNNB1/GSK3B/J<br>UN/MAP3K7/MAPK8/MAPK9/MYC<br>/PPARD/PRKCA/PRKCB/RAC1/SM<br>AD3/TP53/WNT4                                                                                                            | 16 |
| hsa<br>041<br>37 | Mitophagy - animal                                       | 9/384  | 72/8115  | 0.00656<br>6809 | 0.011425<br>488 | 0.004395<br>187 | BCL2L1/E2F1/HIF1A/JUN/MAPK8/<br>MAPK9/RELA/SRC/TP53                                                                                                                                                               | 9  |
| hsa<br>007<br>90 | Folate biosynthesis                                      | 5/384  | 26/8115  | 0.00667<br>3338 | 0.011544<br>108 | 0.004440<br>818 | AKR1B1/ALPL/ALPP/GCH1/TH                                                                                                                                                                                          | 5  |

|                  |                                                       |        |          |                 |                 |                 |                                                                                                    |    |
|------------------|-------------------------------------------------------|--------|----------|-----------------|-----------------|-----------------|----------------------------------------------------------------------------------------------------|----|
| hsa<br>051<br>00 | Bacterial<br>invasion of<br>epithelial cells          | 9/384  | 77/8115  | 0.01012<br>5645 | 0.017416<br>11  | 0.006699<br>675 | ACTB/ACTG1/CAV1/CDC42/CTNN<br>B1/FN1/ITGB1/RAC1/SRC                                                | 9  |
| hsa<br>002<br>60 | Glycine,<br>serine and<br>threonine<br>metabolism     | 6/384  | 40/8115  | 0.01058<br>2376 | 0.018098<br>269 | 0.006962<br>09  | BHMT/CTH/GATM/MAOA/MAOB/<br>SARDH                                                                  | 6  |
| hsa<br>045<br>30 | Tight junction                                        | 15/384 | 169/8115 | 0.01389<br>4434 | 0.023628<br>389 | 0.009089<br>431 | ACTB/ACTG1/CCND1/CDC42/CDK<br>4/ERBB2/ITGB1/JUN/MAPK8/MAP<br>K9/PRKAA1/PRKAA2/PRKAG2/RA<br>C1/SRC  | 15 |
| hsa<br>050<br>34 | Alcoholism                                            | 16/384 | 187/8115 | 0.01559<br>6952 | 0.026374<br>621 | 0.010145<br>859 | ADORA2B/CALM3/CREB1/DDC/D<br>RD2/GNAI1/GNAI2/MAOA/MAOB/<br>MAPK1/MAPK3/NPY/PDYN/RAF1/<br>SLC6A3/TH | 16 |
| hsa<br>002<br>20 | Arginine<br>biosynthesis                              | 4/384  | 22/8115  | 0.01834<br>0383 | 0.030840<br>532 | 0.011863<br>817 | GPT/NOS1/NOS2/NOS3                                                                                 | 4  |
| hsa<br>004<br>80 | Glutathione<br>metabolism                             | 7/384  | 58/8115  | 0.01888<br>4602 | 0.031579<br>251 | 0.012147<br>99  | G6PD/GSTM1/GSTM2/GSTP1/ODC<br>1/PRDX6/RRM2                                                         | 7  |
| hsa<br>046<br>14 | Renin-angioten-<br>sin system                         | 4/384  | 23/8115  | 0.02139<br>4035 | 0.035577<br>925 | 0.013686<br>21  | ACE/AGT/MME/REN                                                                                    | 4  |
| hsa<br>033<br>20 | PPAR<br>signaling<br>pathway                          | 8/384  | 75/8115  | 0.02475<br>9365 | 0.040948<br>18  | 0.015752<br>054 | LPL/MMP1/NR1H3/OLR1/PPARA/P<br>PARD/PPARG/RXRA                                                     | 8  |
| hsa<br>009<br>80 | Metabolism of<br>xenobiotics by<br>cytochrome<br>P450 | 8/384  | 78/8115  | 0.03048<br>3088 | 0.049866<br>356 | 0.019182<br>721 | CYP1A1/CYP1A2/CYP1B1/CYP3A4<br>/EPHX1/GSTM1/GSTM2/GSTP1                                            | 8  |
| hsa<br>046<br>12 | Antigen<br>processing<br>and<br>presentation          | 8/384  | 78/8115  | 0.03048<br>3088 | 0.049866<br>356 | 0.019182<br>721 | CREB1/HLA-A/HLA-B/HLA-C/HLA<br>-G/HSPA5/IFNG/TNF                                                   | 8  |
| hsa<br>049<br>70 | Salivary<br>secretion                                 | 9/384  | 93/8115  | 0.03132<br>9183 | 0.050973<br>428 | 0.019608<br>593 | ADRB1/ADRB2/ADRB3/CALM3/K<br>CNN4/NOS1/PRKCA/PRKCB/TRPV<br>6                                       | 9  |
| hsa<br>003<br>60 | Phenylalanine<br>metabolism                           | 3/384  | 16/8115  | 0.03720<br>434  | 0.060158<br>446 | 0.023141<br>91  | DDC/MAOA/MAOB                                                                                      | 3  |
| hsa<br>054<br>14 | Dilated<br>cardiomyopat<br>hy                         | 9/384  | 96/8115  | 0.03737<br>4184 | 0.060158<br>446 | 0.023141<br>91  | ACTB/ACTC1/ACTG1/ADRB1/AGT<br>/ITGB1/TGFB1/TGFB2/TNF                                               | 9  |

|     |                               |        |          |                 |                 |                 |                                                                                                                                                         |    |
|-----|-------------------------------|--------|----------|-----------------|-----------------|-----------------|---------------------------------------------------------------------------------------------------------------------------------------------------------|----|
| hsa | Amyotrophic lateral sclerosis | 25/384 | 364/8115 | 0.03835<br>1937 | 0.061403<br>899 | 0.023621<br>014 | ACTB/ACTG1/ATP5F1B/BAD/BAX/<br>BCL2/BCL2L1/CASP1/CASP3/CASP<br>9/CAT/CYCS/EIF2S1/HSPA5/MAPK<br>14/MTOR/NOS1/NOS2/RAC1/SDHA<br>/SDHB/SOD1/TNF/TP53/TRAF2 | 25 |
| hsa | Carbon metabolism             | 10/384 | 115/8115 | 0.04533<br>2071 | 0.072195<br>521 | 0.027772<br>363 | CAT/CS/ENO1/ENO2/ENO3/G6PD/<br>GPT/H6PD/SDHA/SDHB                                                                                                       | 10 |
| hsa | Oocyte meiosis                | 11/384 | 131/8115 | 0.04572<br>2486 | 0.072434<br>044 | 0.027864<br>119 | AR/CALM3/CCNB1/CCNE1/CDK2/I<br>GF1R/INS/MAPK1/MAPK14/MAPK<br>3/PGR                                                                                      | 11 |
| hsa | Axon guidance                 | 14/384 | 182/8115 | 0.04956<br>751  | 0.078114<br>243 | 0.030049<br>193 | CDC42/CXCL12/FYN/GNAI1/GNAI<br>2/GSK3B/ITGB1/MAPK1/MAPK3/P<br>RKCA/RAC1/RAF1/SRC/WNT4                                                                   | 14 |

---
